# Supplementary material
Source: PubMed Central journal article supplement (PMC8669285)
Supplement: sj-pdf-1-jcb-10.1177_0271678X211033358.pdf [file sj-pdf-1-jcb-10.1177_0271678X211033358.pdf]

## Supplementary Information

Differential regulation of oxidative stress, microbiota-derived, and energy metabolites in the mouse brain during sleep

Theodosia Vallianatou, Weifeng Lin, Nicholas B. Bèchet, Mario S.P. Correia, Nagesh C. Shanbhag, Iben Lundgaard, Daniel Globisch

Daniel Globisch, Email: [daniel.globisch@scilifelab.uu.se](mailto:daniel.globisch@scilifelab.uu.se)

### **This PDF file includes:**

Figures S1 to S22  
Tables S1 to S10  
SI References

## Supplementary Figures

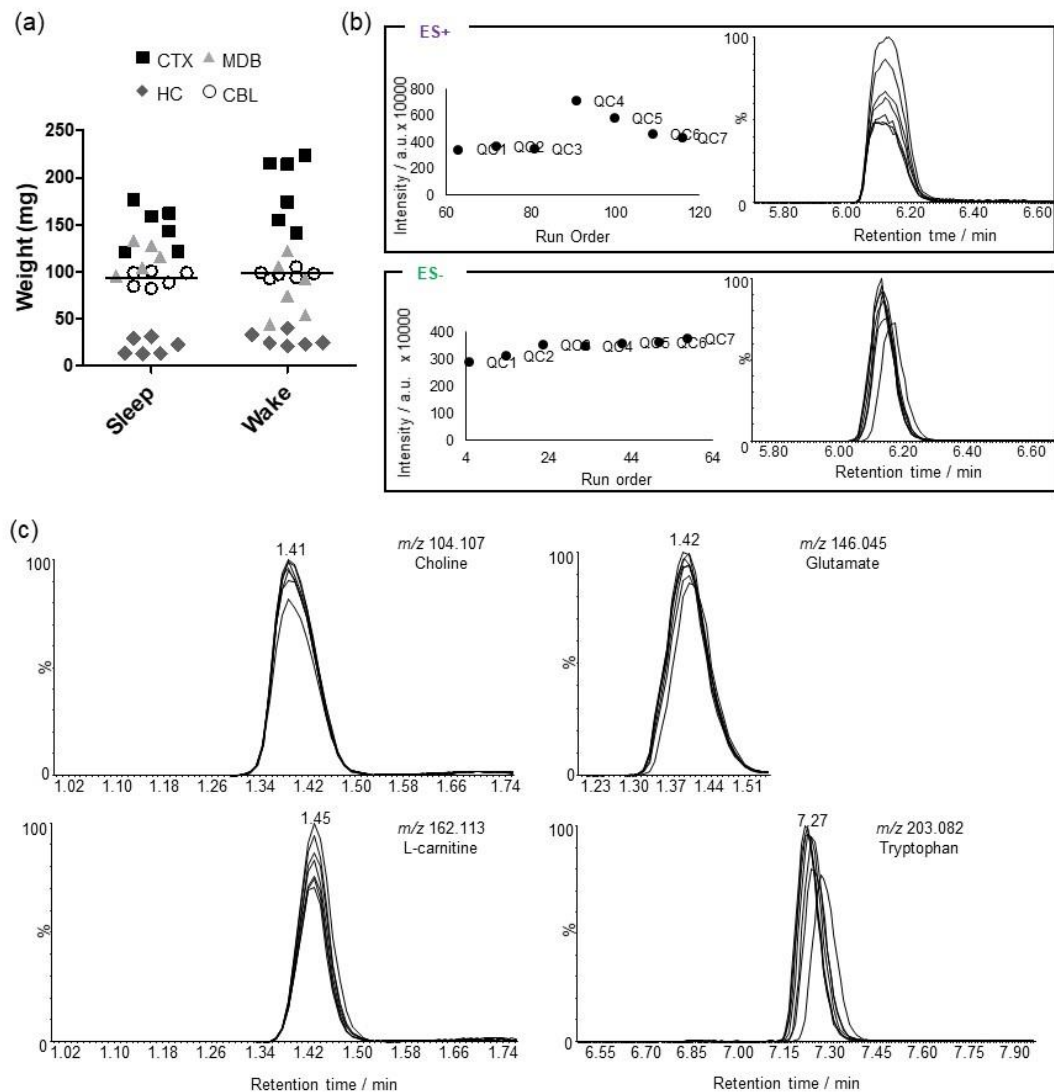

**Supplementary Figure 1. Quality control for the metabolomics analysis.** (a) Distribution of the brain regions weight (mg) in sleep-state and wake-state animals. (b) Internal standard stability. UPLC-MS analysis time (run order) of C-13 isotopically labeled phenylalanine in positive (ES+,  $m/z$  176.113) and negative (ES-,  $m/z$  174.098) ionization mode in the quality control (QC) samples. (c) Representative UPLC-MS chromatograms of endogenous brain metabolites in the quality control samples. Choline and L-carnitine were detected in positive ionization mode, glutamate and tryptophan were detected in negative ionization mode and demonstrate high stability

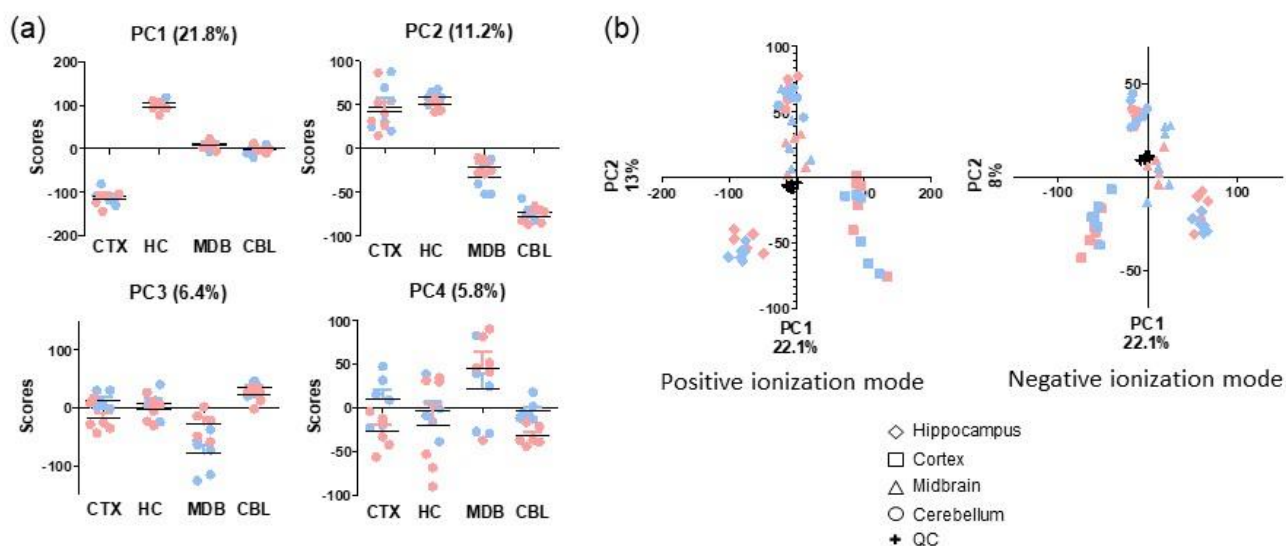

**Supplementary Figure 2. Principal component analysis of the global UPLC-MS metabolomics data.** (a) Score values of the four principal components of the combined positive and negative ionization mode UPLC-MS data presented as separate dot plots to highlight the main variance in each component. (b) Principal component analysis in positive and negative ionization mode separately. Abbreviations: CBL, cerebellum; CTX, cortex; HC, hippocampus; MDB, midbrain.

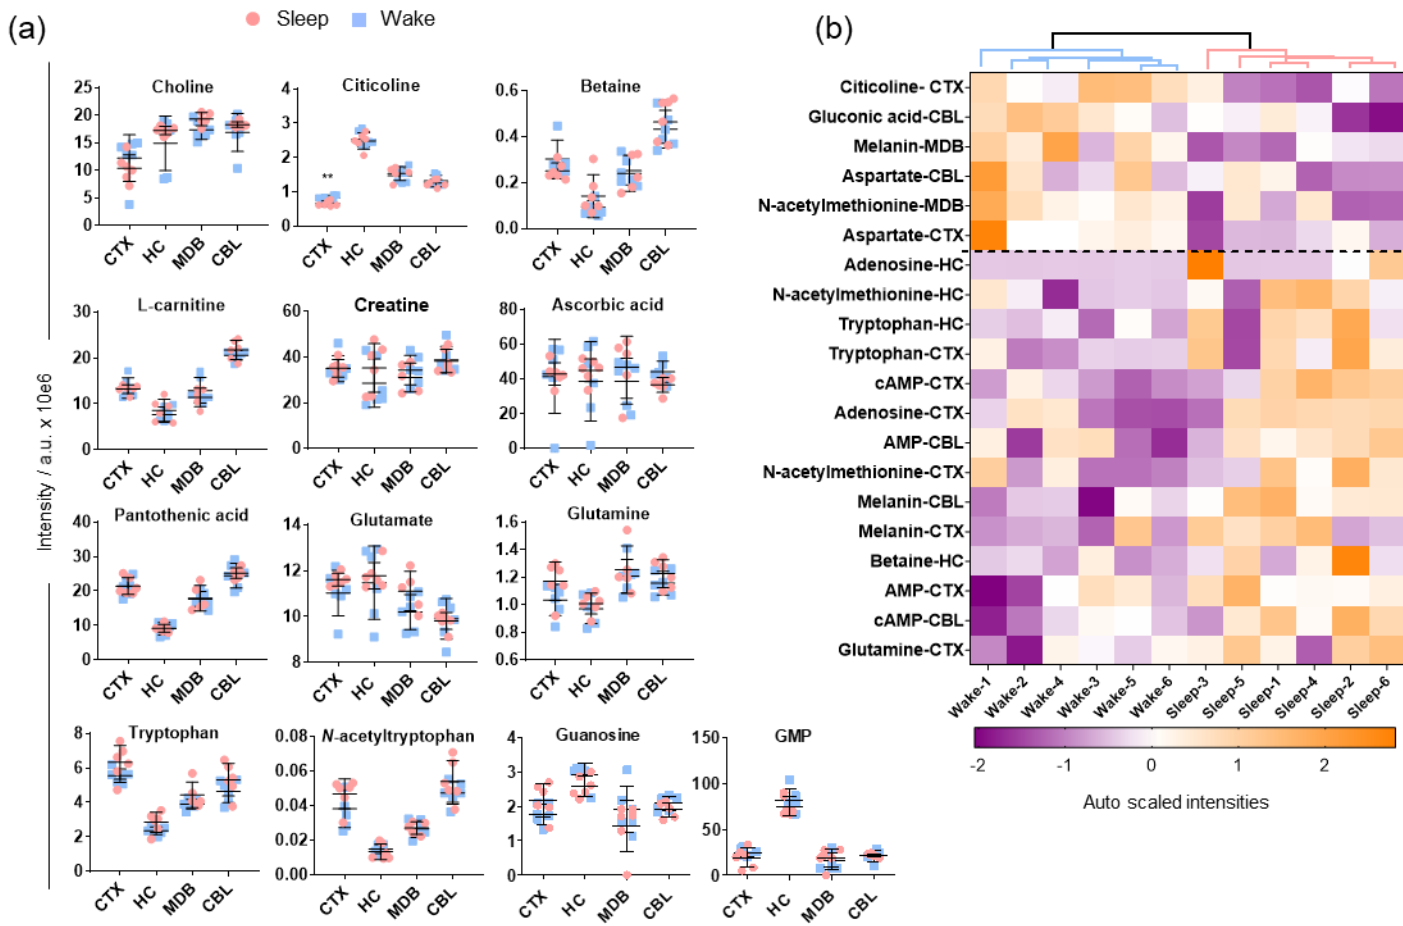

**Supplementary Figure 3. Brain regional differences of selected brain molecules.** (a) Dot plots of selected brain metabolites and neurotransmitters in both groups and all examined regions, ordered in an anatomical orientation from the most anterior part to the cerebellum; (b) Heatmap of the top twenty molecules (t-test) based on their auto scaled intensities (N=6). Error bars represent the standard deviation (SD); Two tailed unpaired *t*-test: \*\**P* < 0.01. Abbreviations: CBL, cerebellum; CTX, cortex; HC, hippocampus; MDB, midbrain

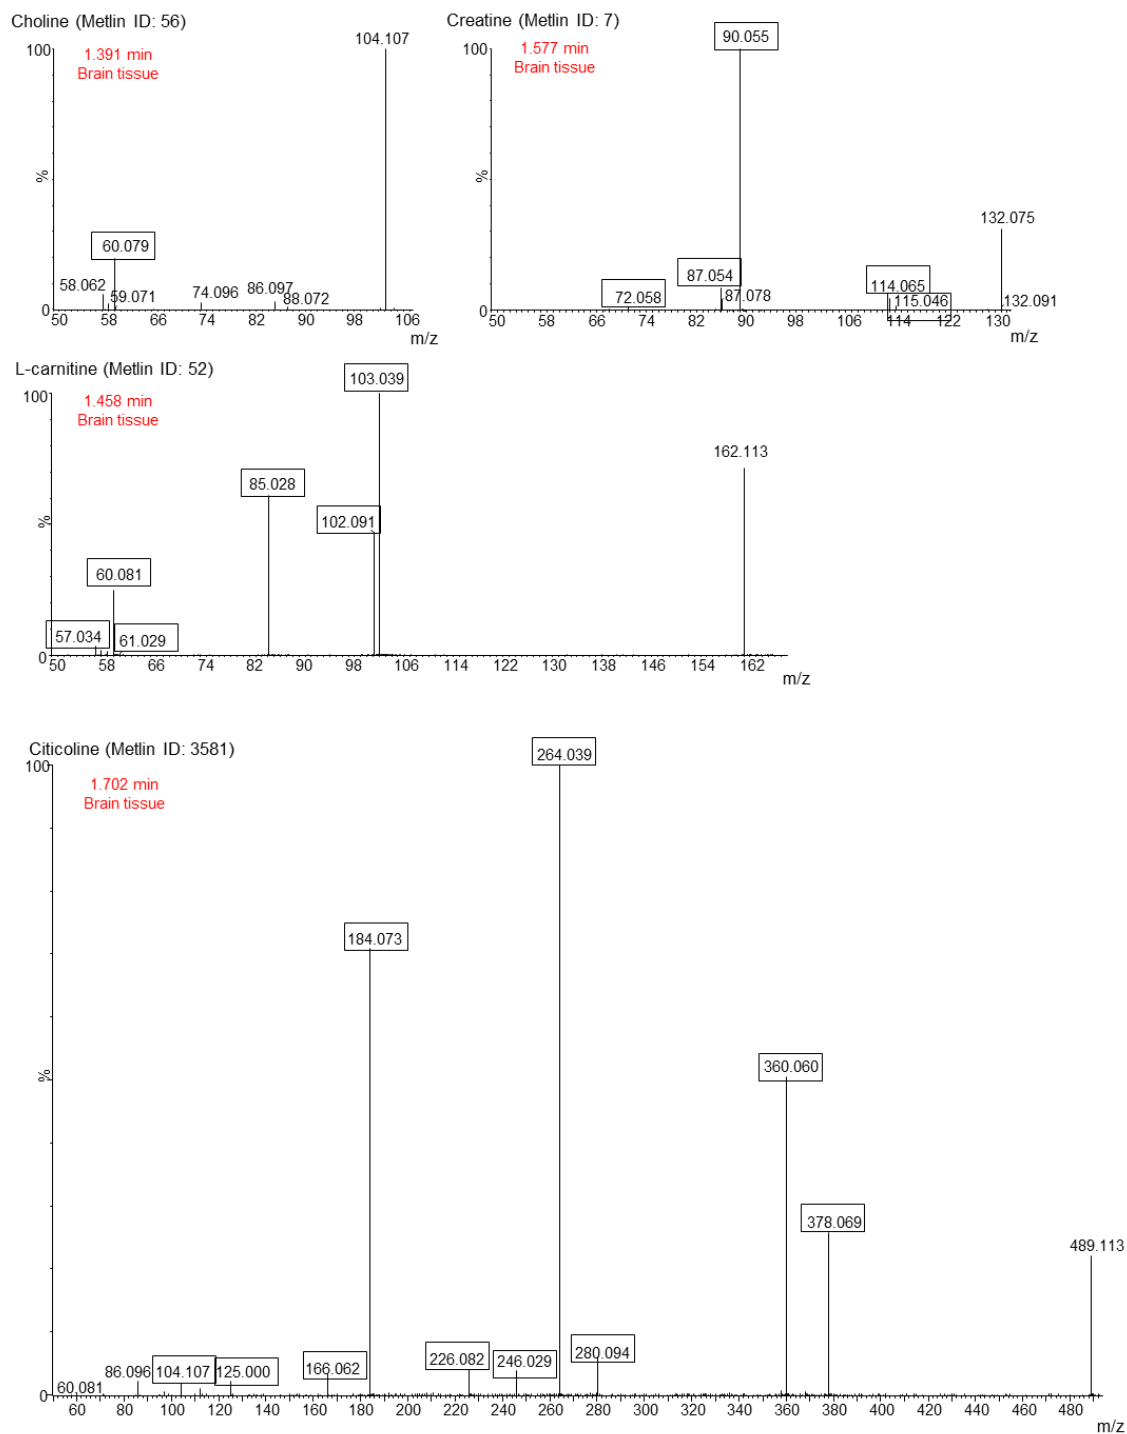

**Supplementary Figure 4. Tandem MS/MS spectra for the structural validation of brain metabolites in positive ionization mode.** Pooled brain tissue was used for the UPLC-MS/MS analysis and spectra acquired at 20 eV. MS/MS spectra were compared to experimental MS/MS spectra available in the Metlin database and common product ions are annotated with a black rectangle. Metlin ID numbers are provided.

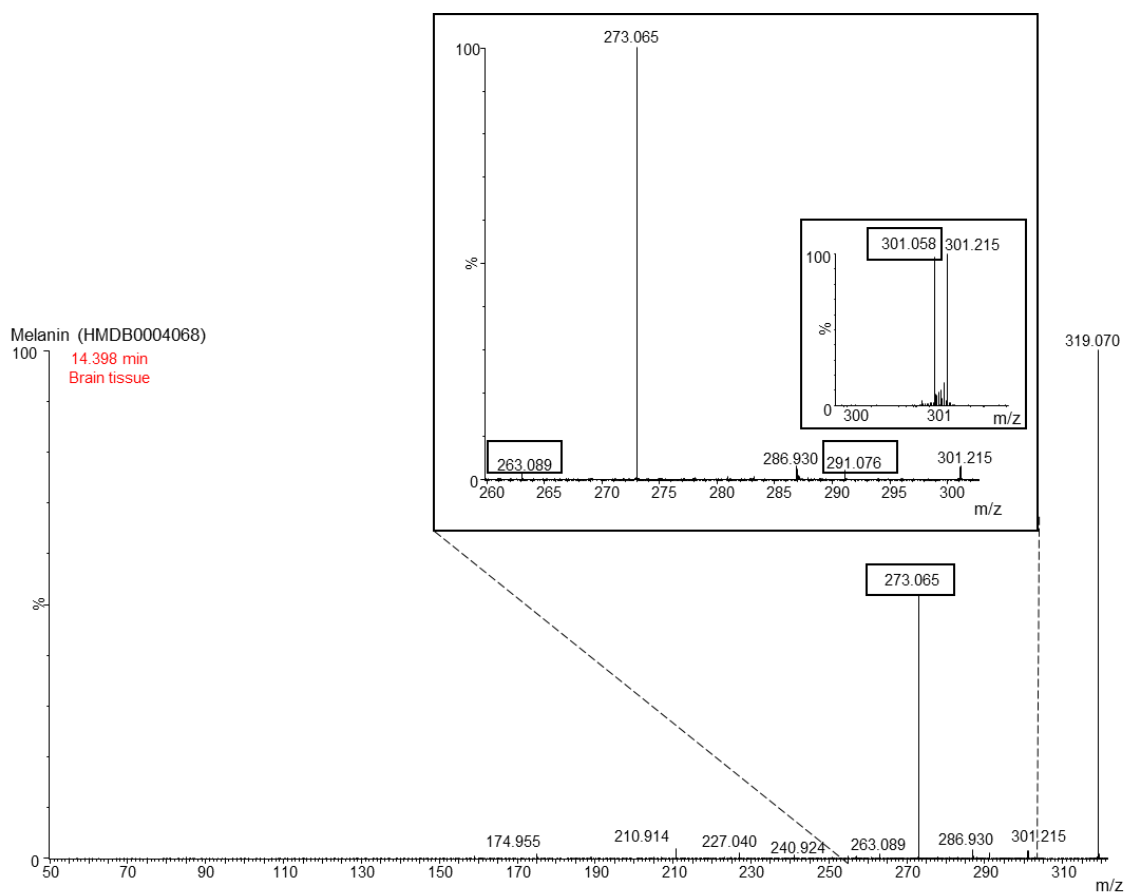

**Supplementary Figure 5. Tandem MS/MS spectra for the structural validation of melatonin in positive ionization mode.** Pooled brain tissue was used for the UPLC-MS/MS analysis and spectra acquired at 10 eV. MS/MS spectra were compared to predicted MS/MS spectra available in the HMDB database and common product ions are annotated with a black rectangle. HMDB ID number is provided.

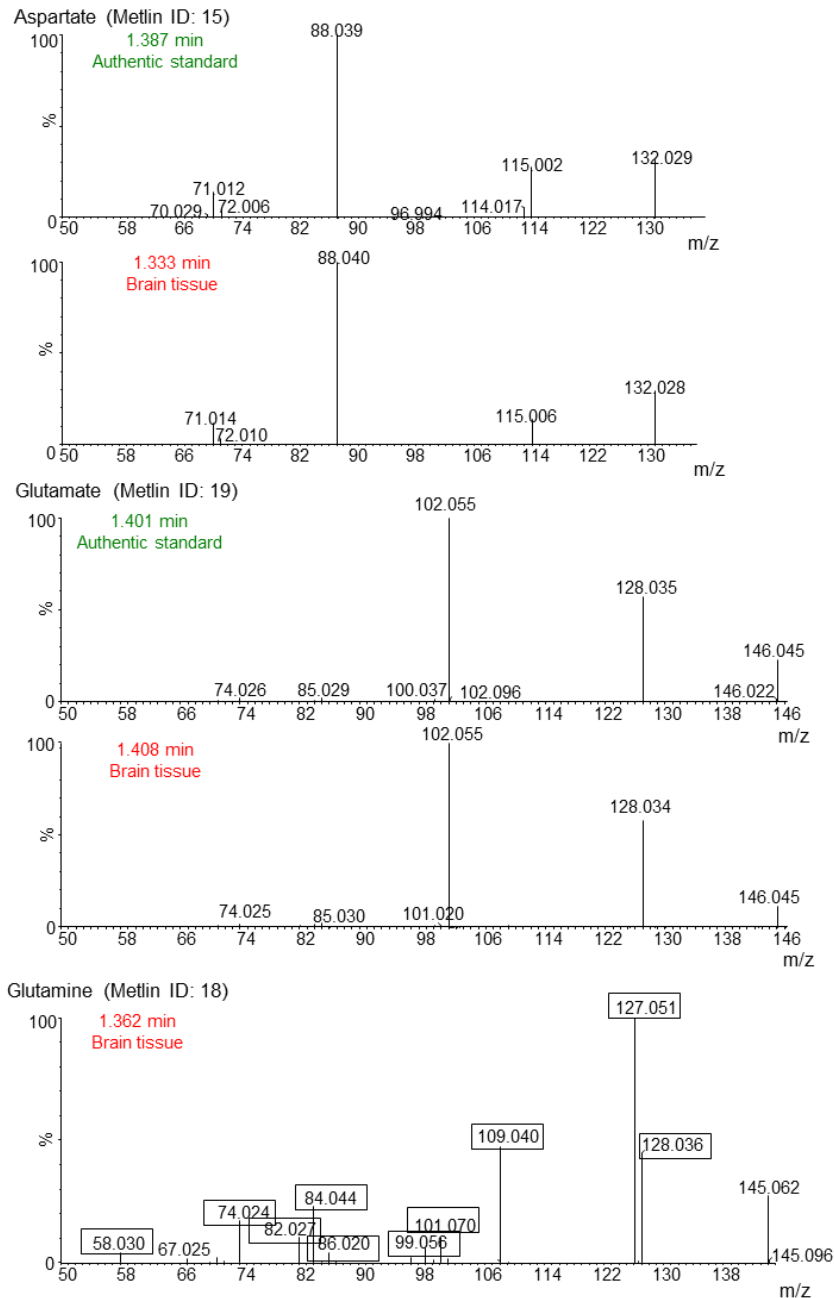

**Supplementary Figure 6. Tandem MS/MS spectra for the structural validation of brain metabolites in negative ionization mode.** Pooled brain tissue was used for the UPLC-MS/MS analysis and spectra acquired at 20 eV. In the case of aspartate and glutamate the acquired MS/MS spectra were compared to MS/MS spectra collected in authentic standards. In the case of glutamine, MS/MS spectra were compared to experimental MS/MS spectra available in the Metlin database and common product ions are annotated with a black rectangle. Metlin ID numbers are provided.

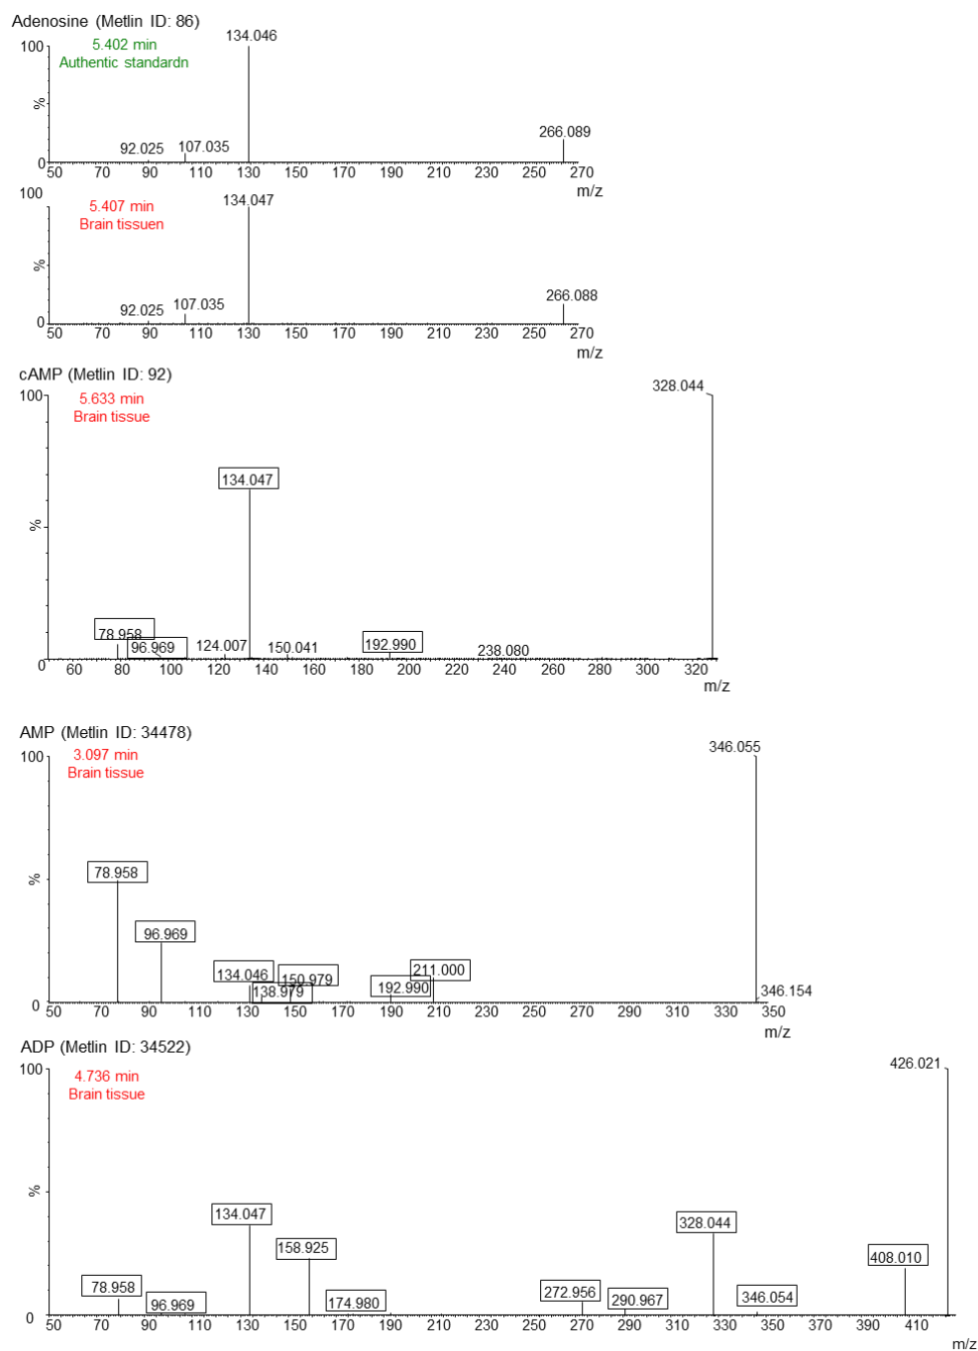

**Supplementary Figure 7. Tandem MS/MS spectra for the structural validation of brain metabolites in negative ionization mode.** Pooled brain tissue was used for the UPLC-MS/MS analysis and spectra acquired at 20 eV. In the case of adenosine, the acquired MS/MS spectra were compared to MS/MS spectra collected in authentic standards. Otherwise, MS/MS spectra were compared to experimental MS/MS spectra available in the Metlin database and common product ions are annotated with a black rectangle. Metlin ID numbers are provided.



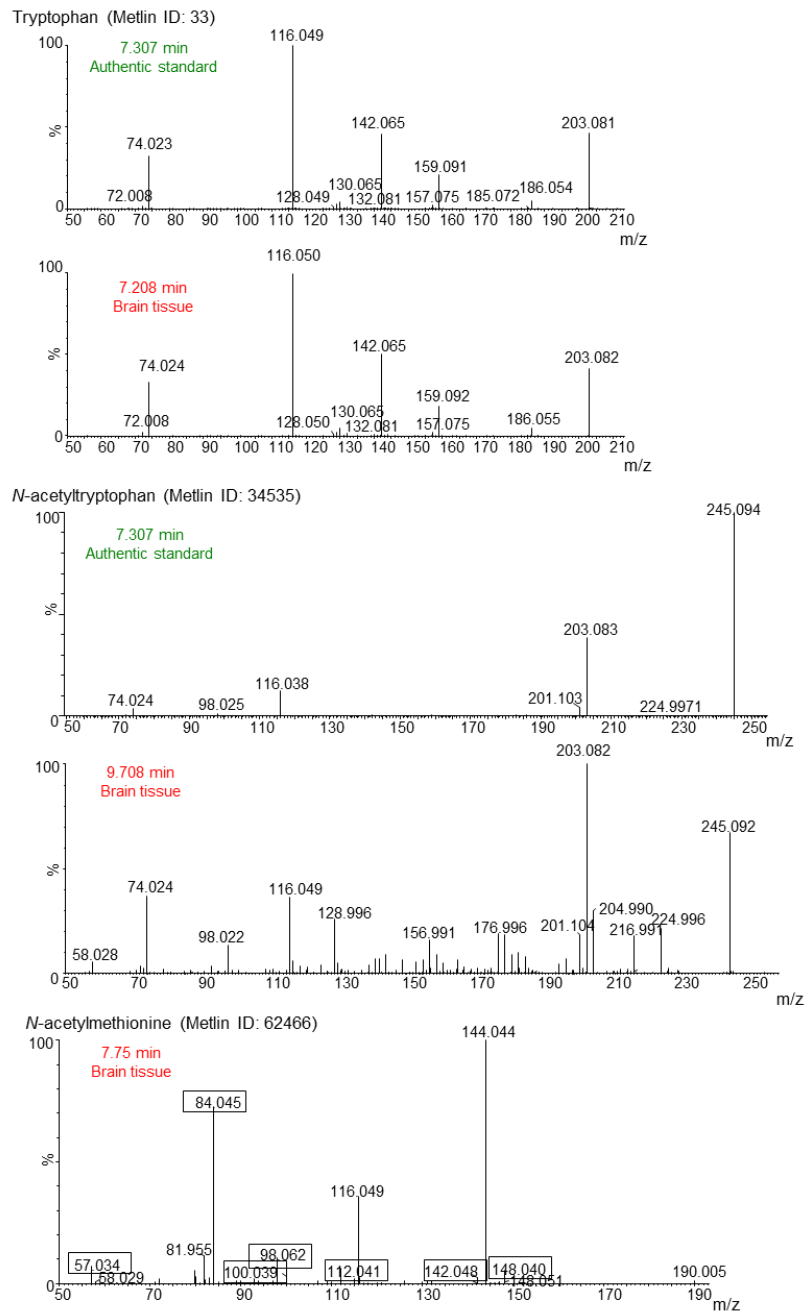

**Supplementary Figure 8. Tandem MS/MS spectra for the structural validation of brain metabolites in negative ionization mode.** Pooled brain tissue was used for the UPLC-MS/MS analysis and spectra acquired at 20 eV. In the case of tryptophan and *N*-acetyltryptophan, the acquired MS/MS spectra were compared to MS/MS spectra collected in authentic standards. In the case of *N*-acetylmethionine, MS/MS spectra were compared to experimental MS/MS spectra available in the Metlin database and common product ions are annotated with a black rectangle. Metlin ID numbers are provided.

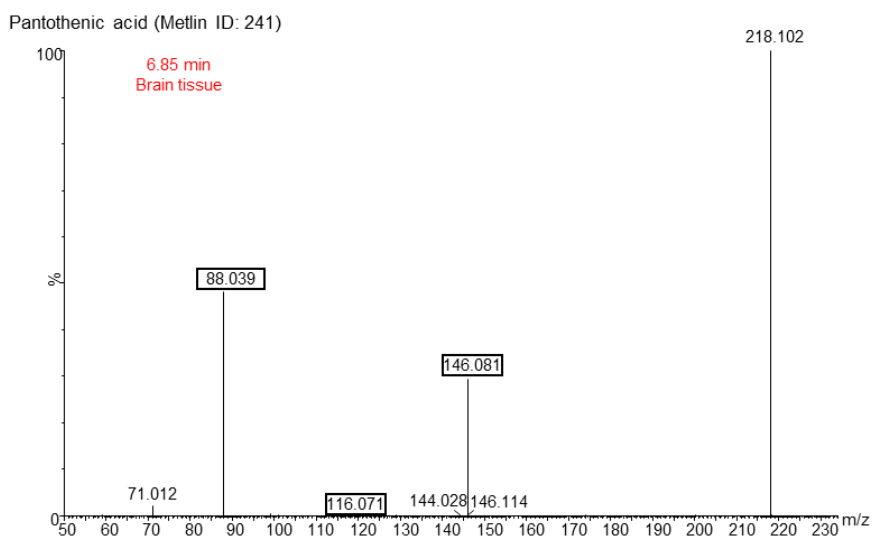

**Supplementary Figure 9. Tandem MS/MS spectra for the structural validation of pantothenic acid in negative ionization mode.** Pooled brain tissue was used for the UPLC-MS/MS analysis and spectra acquired at 20 eV. MS/MS spectra were compared to experimental MS/MS spectra available in the Metlin database and common product ions are annotated with a black rectangle. Metlin ID number is provided.

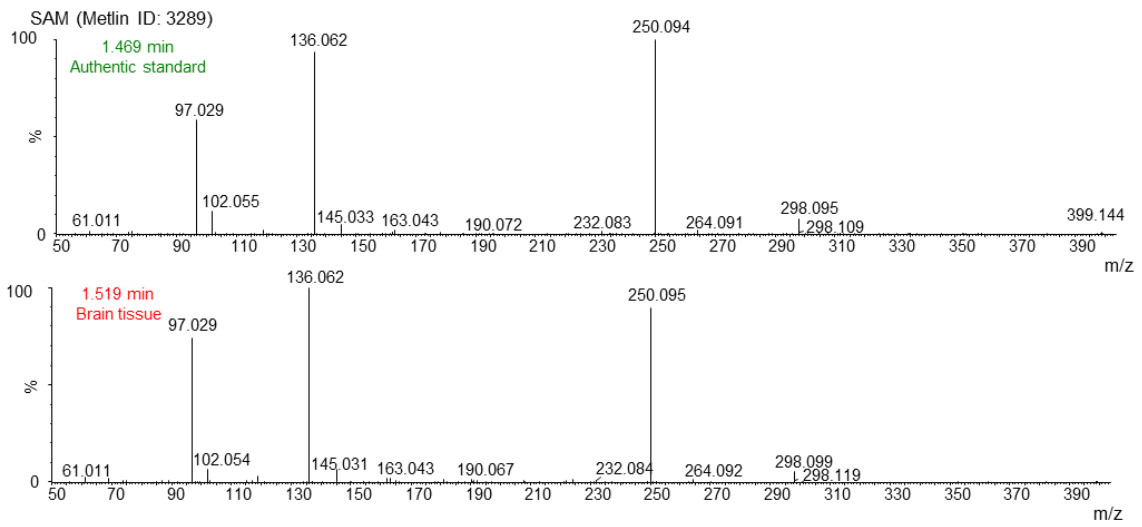

**Glutathione (Metlin ID: 44)**

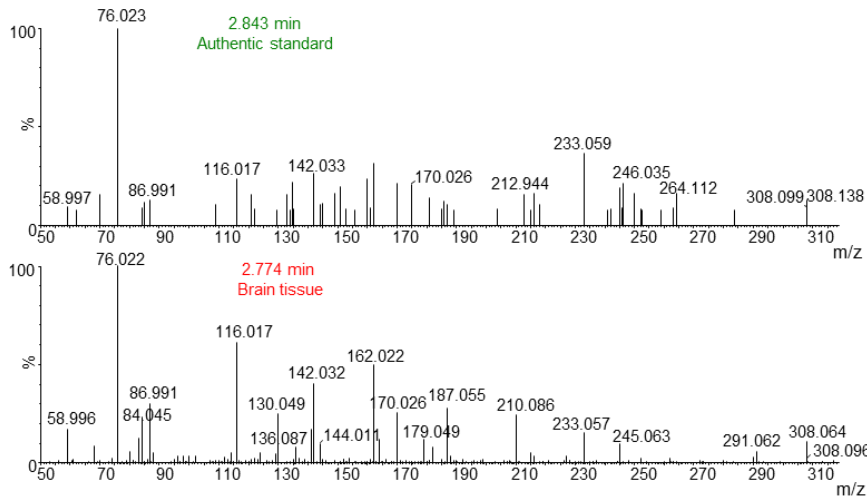

**S-lactoyl glutathione (HMDB0001066)**

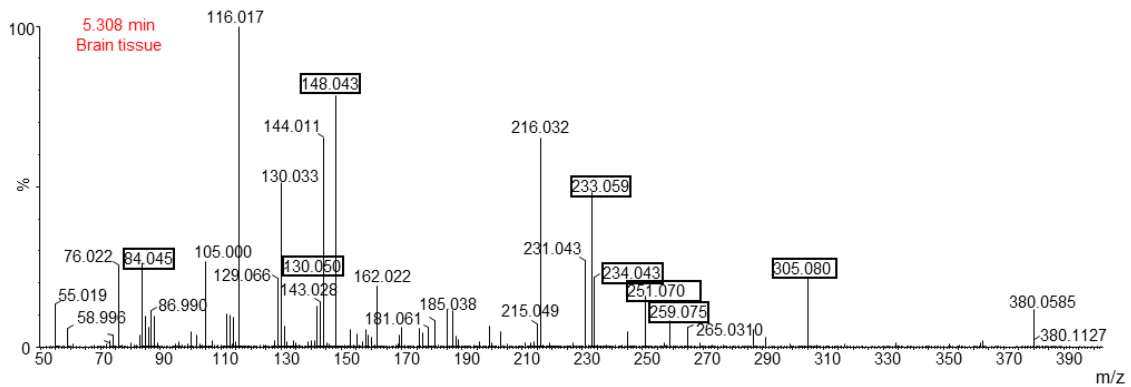

Oxidized glutathione (Metlin ID: 45)

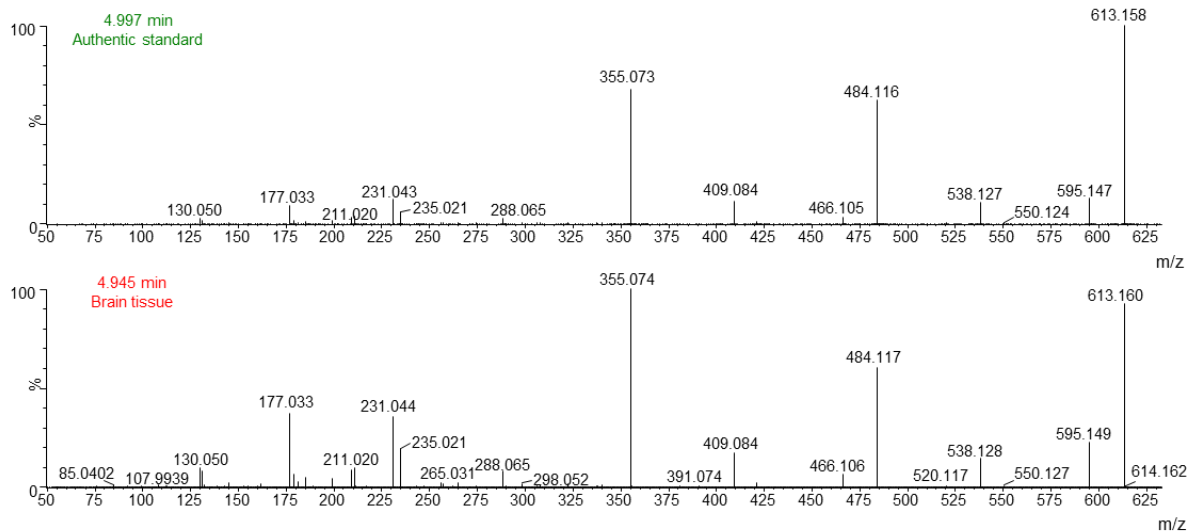

**Supplementary Figure 10. Tandem MS/MS spectra for the structural validation of sulfur containing brain metabolites in positive ionization mode.** Pooled brain tissue was used for the UPLC-MS/MS analysis and spectra acquired at 20 eV. In the case of SAM, glutathione and oxidized glutathione, the acquired MS/MS spectra were compared to MS/MS spectra collected in authentic standards. In the case of S-lactoylglutathione, MS/MS spectra were compared to predicted MS/MS spectra available in the Metlin database and common product ions are annotated with a black rectangle. Metlin ID numbers are provided.

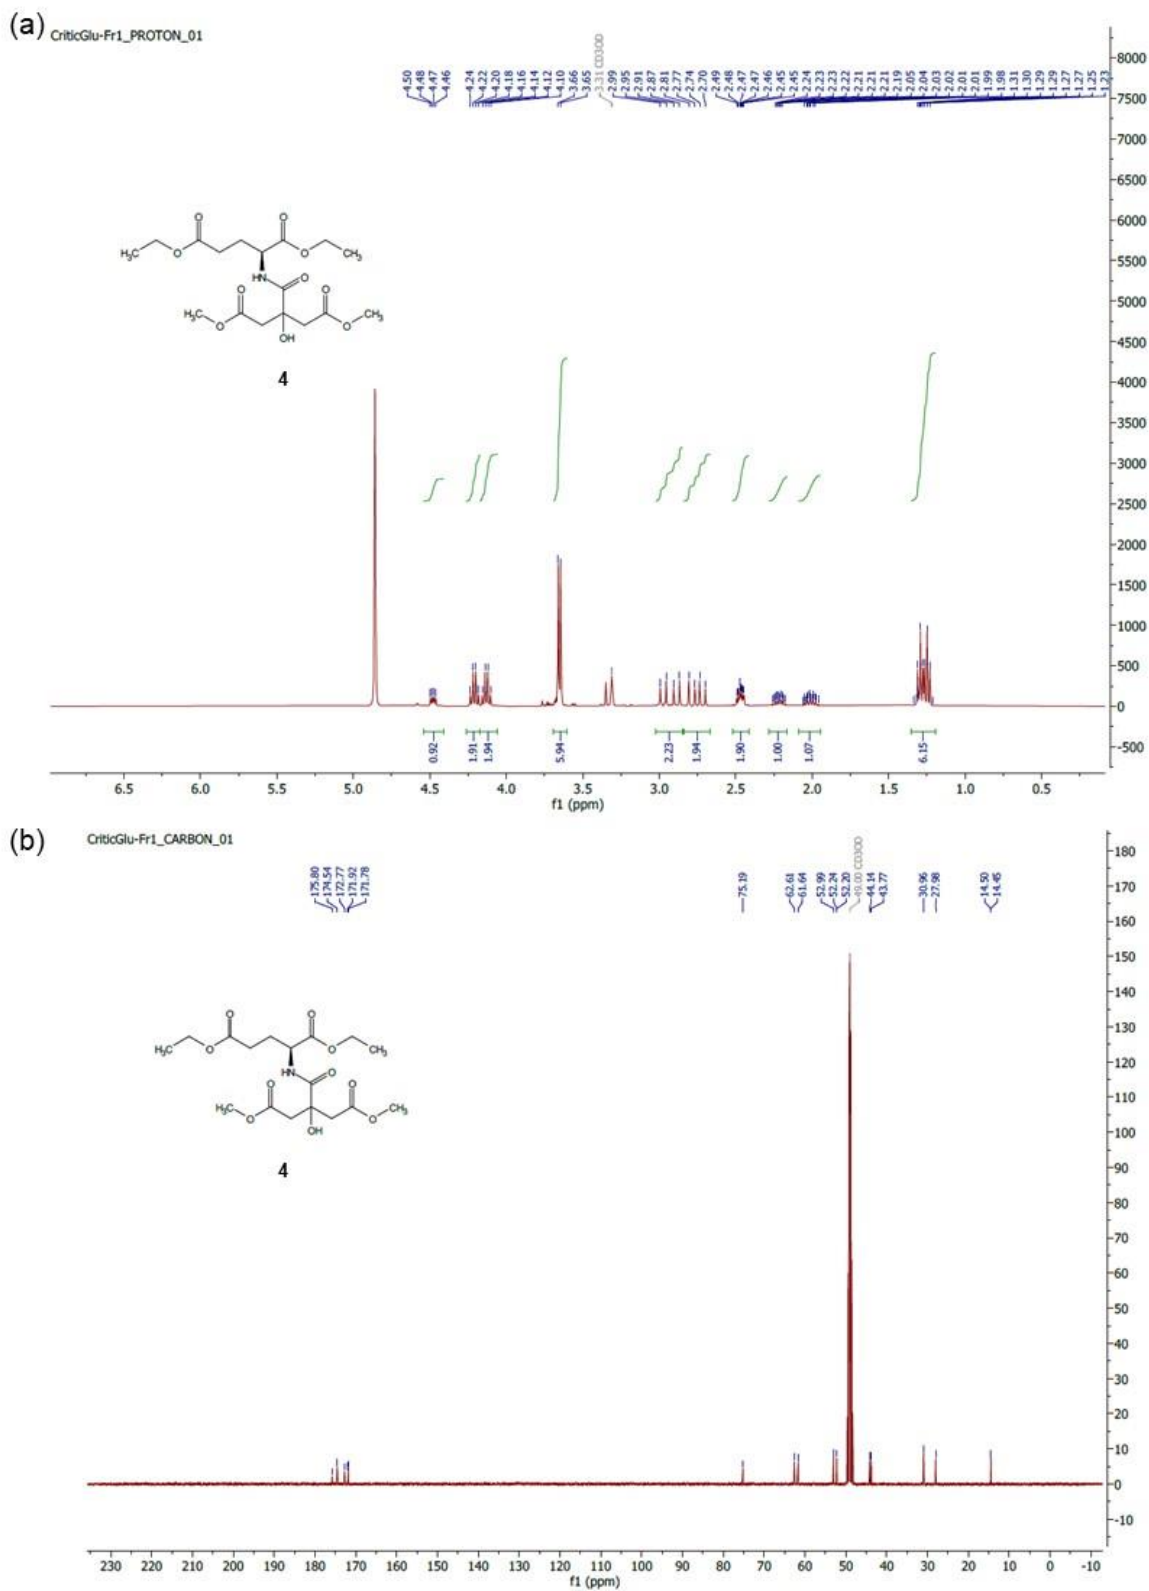

**Supplementary Figure 11. NMR spectra for synthetic intermediate 4.** (a)  $^1\text{H}$ -NMR data obtained for compound 4. (b)  $^{13}\text{C}$  NMR data obtained for compound 4.

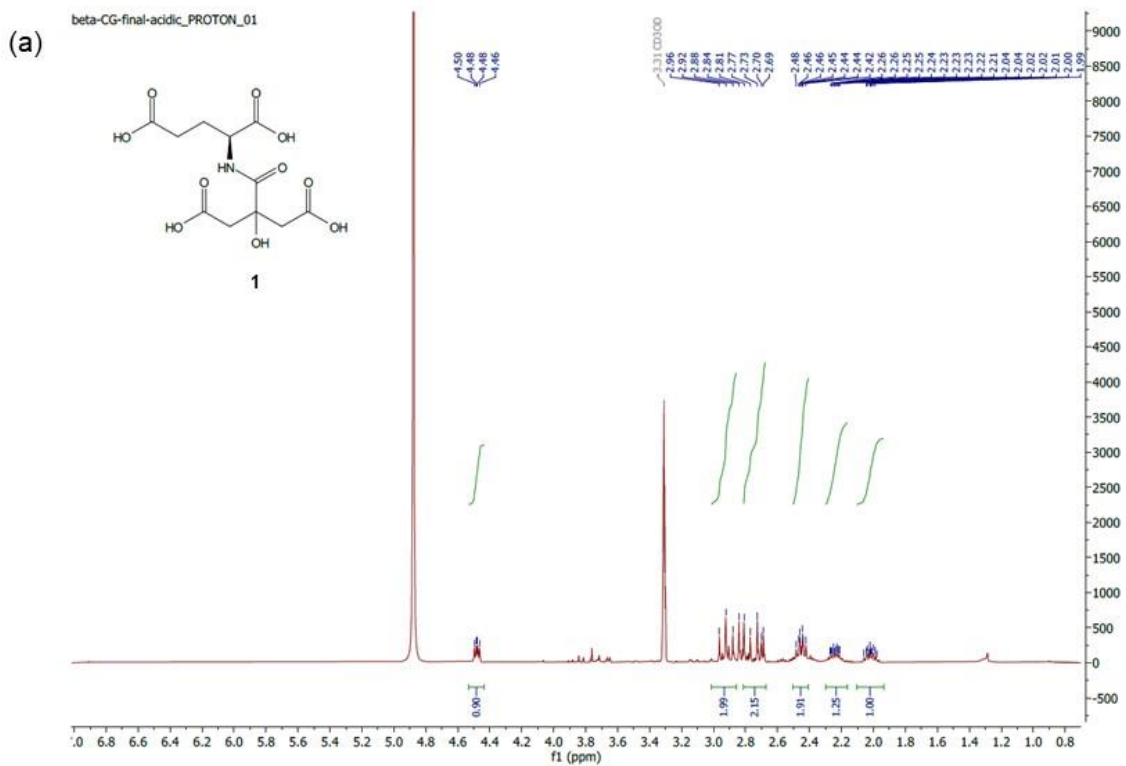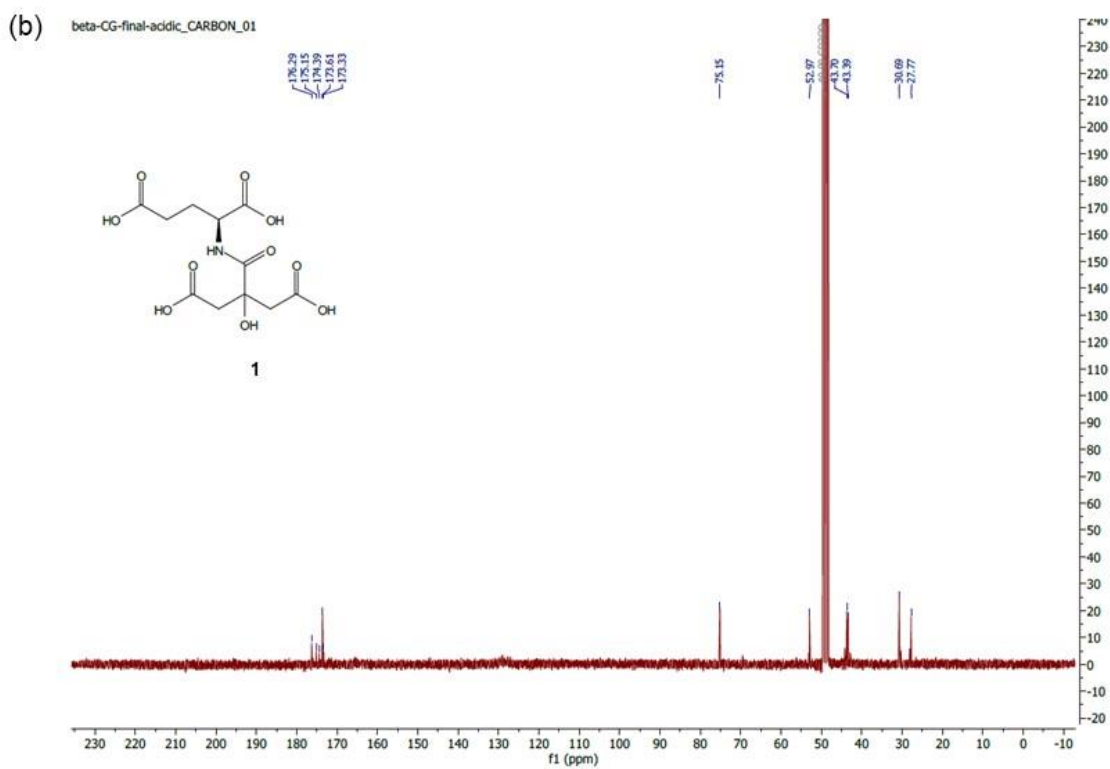

**Supplementary Figure 12. NMR spectra for  $\beta$ -citryl-glutamate (1).** (a)  $^1\text{H}$ -NMR data obtained for compound 1. (b)  $^{13}\text{C}$  NMR data obtained for compound 1.

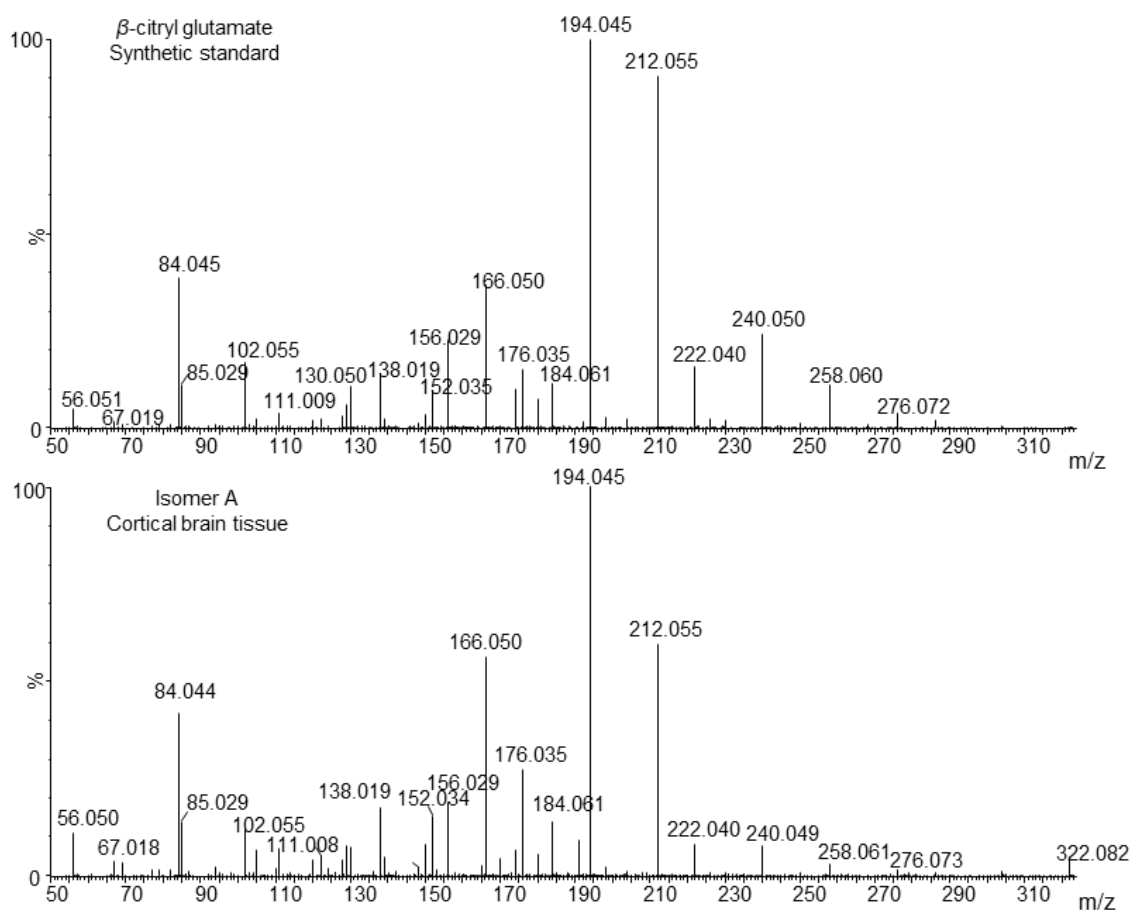

**Supplementary Figure 13. Comparison of MS/MS fragmentation spectra of the  $\beta$ -citryl-glutamate and isomer A.** Pooled cortical brain tissue was used for the UPLC-MS/MS analysis and spectra acquired at 20 eV in negative ionization mode. The MS/MS spectra were compared to the MS/MS spectra acquired for the synthetic standard of  $\beta$ -citryl glutamate at 20 eV.

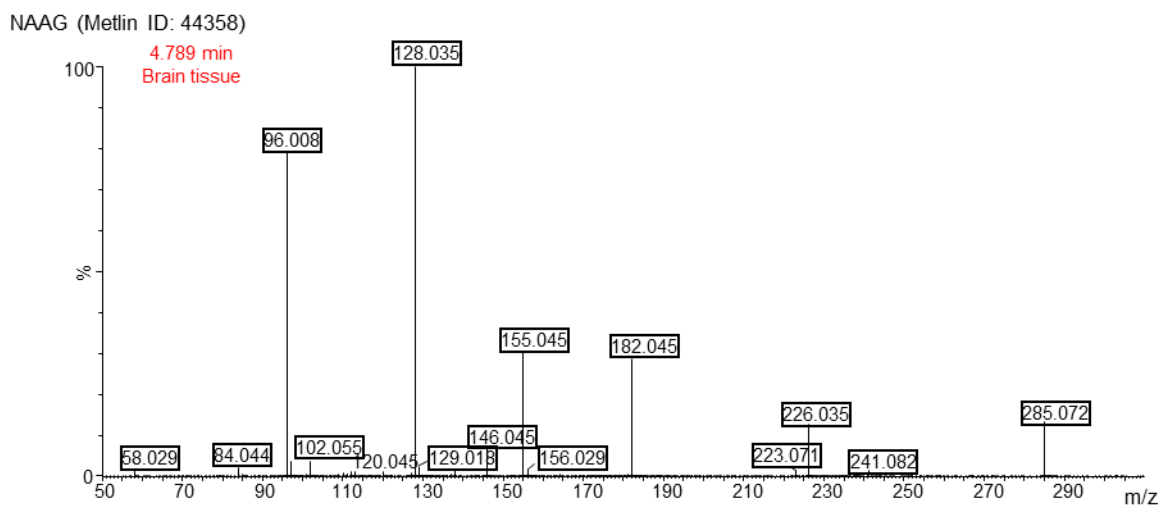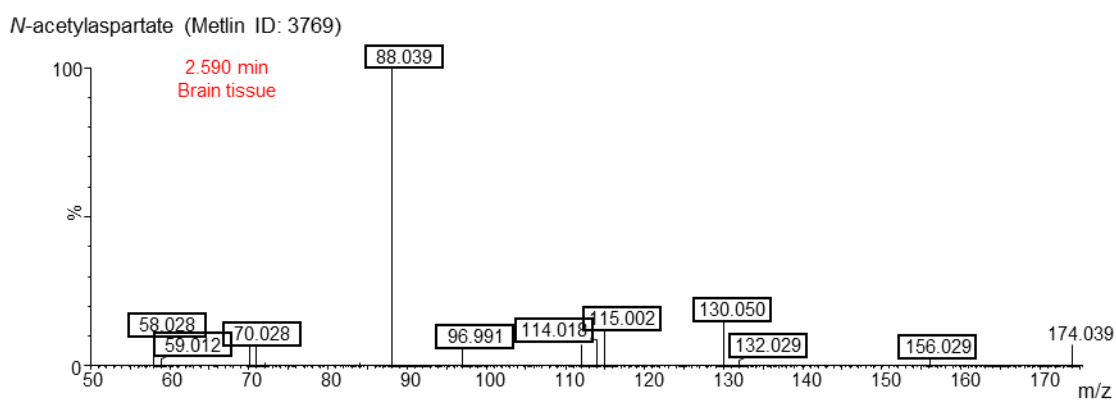

**Supplementary Figure 14. Structural validation and brain distribution of NAAG and *N*-acetylaspartate.**

Tandem MS/MS spectra for the structural validation of NAAG and *N*-acetylaspartate in negative ionization mode. Pooled brain tissue was used for the UPLC-MS/MS analysis and spectra acquired at 20 eV. The acquired MS/MS spectra were compared to experimental MS/MS spectra available in the Metlin database and common product ions are annotated with a black rectangle. Metlin ID numbers are provided. (



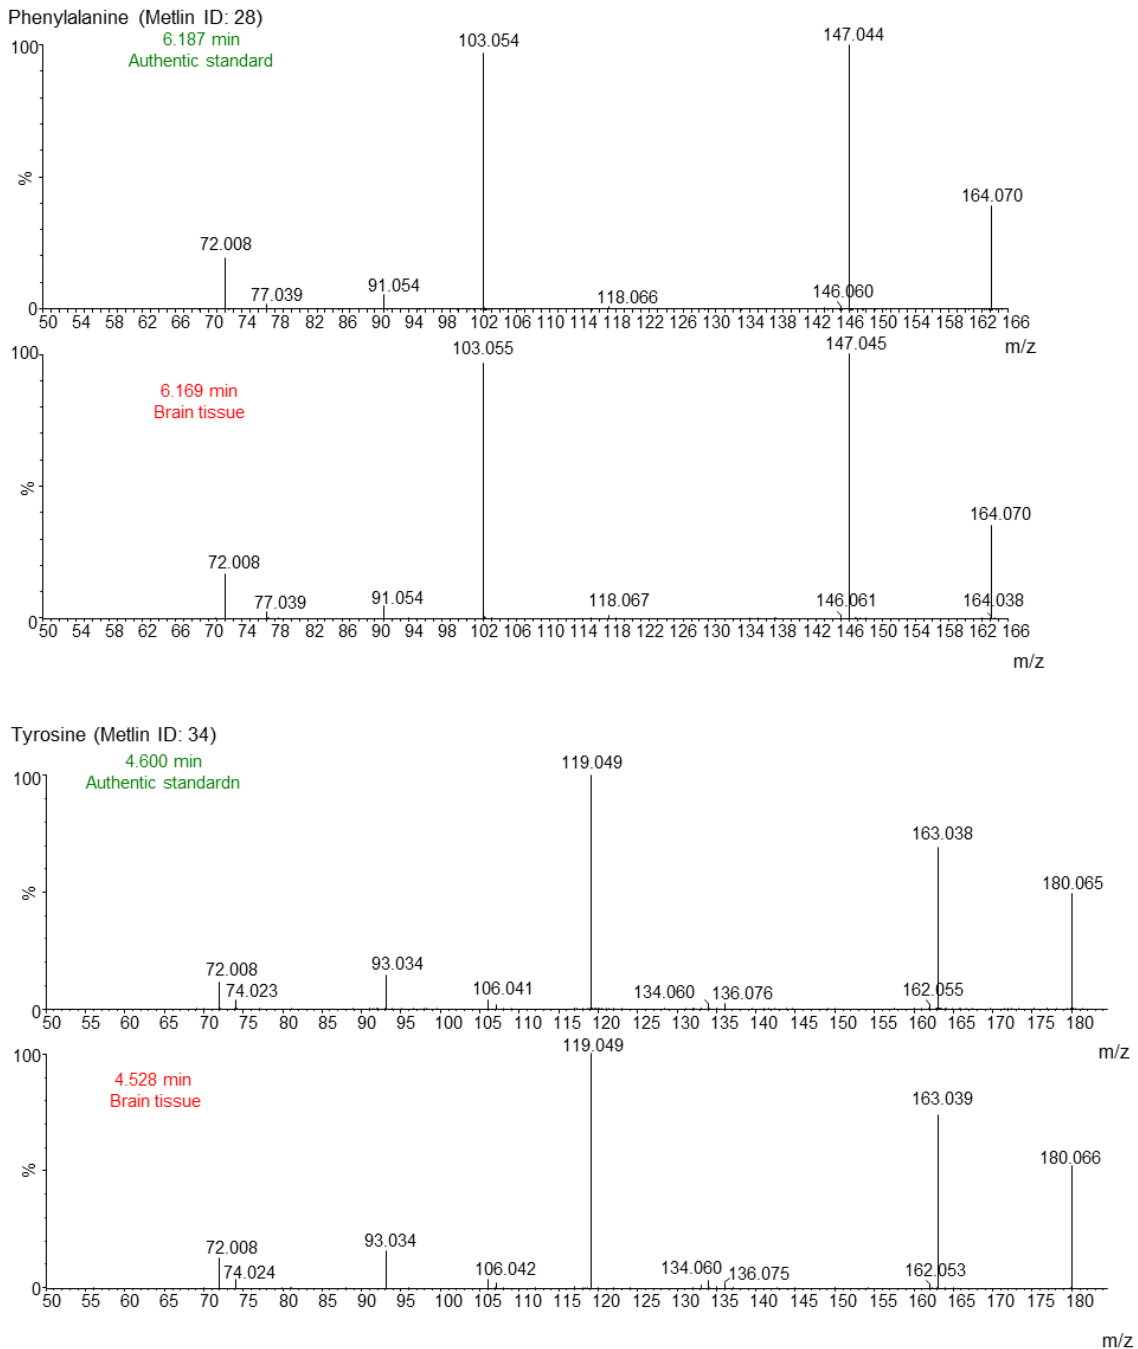

**Supplementary Figure 15. Tandem MS/MS spectra for the structural validation of phenylalanine and tyrosine in negative ionization mode.** Pooled brain tissue was used for the UPLC-MS/MS analysis and spectra acquired at 20 eV. The acquired MS/MS spectra were compared to MS/MS spectra collected in authentic standards. Metlin ID numbers are provided.

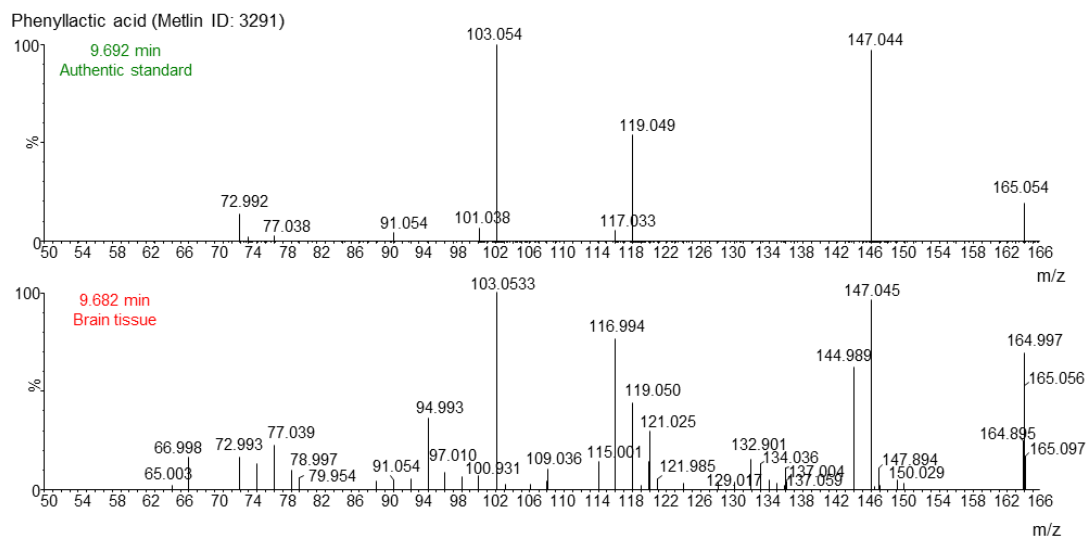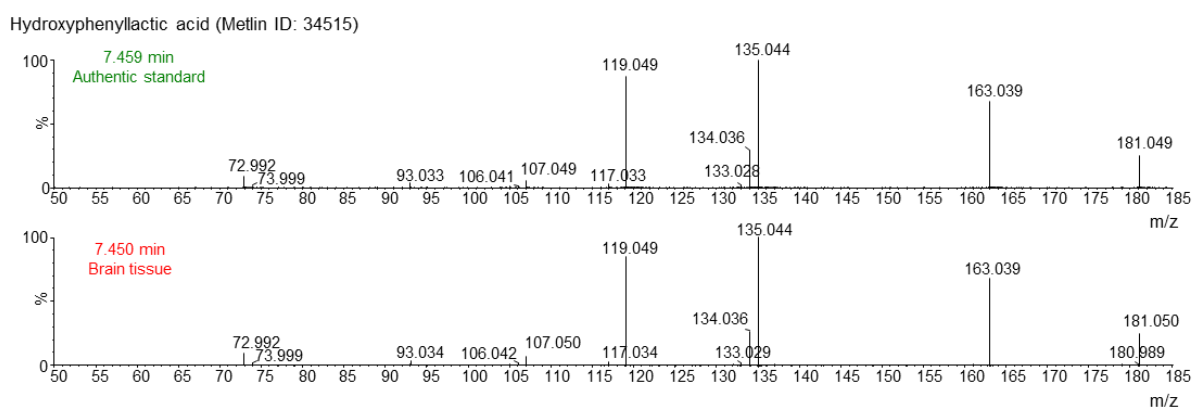

**Supplementary Figure 16. Tandem MS/MS spectra for the structural validation of phenyllactic acid and hydroxyphenyllactic acid in negative ionization mode.** Pooled brain tissue was used for the UPLC-MS/MS analysis and spectra acquired at 20 eV. The acquired MS/MS spectra were compared to MS/MS spectra collected in authentic standards. Metlin ID numbers are provided.

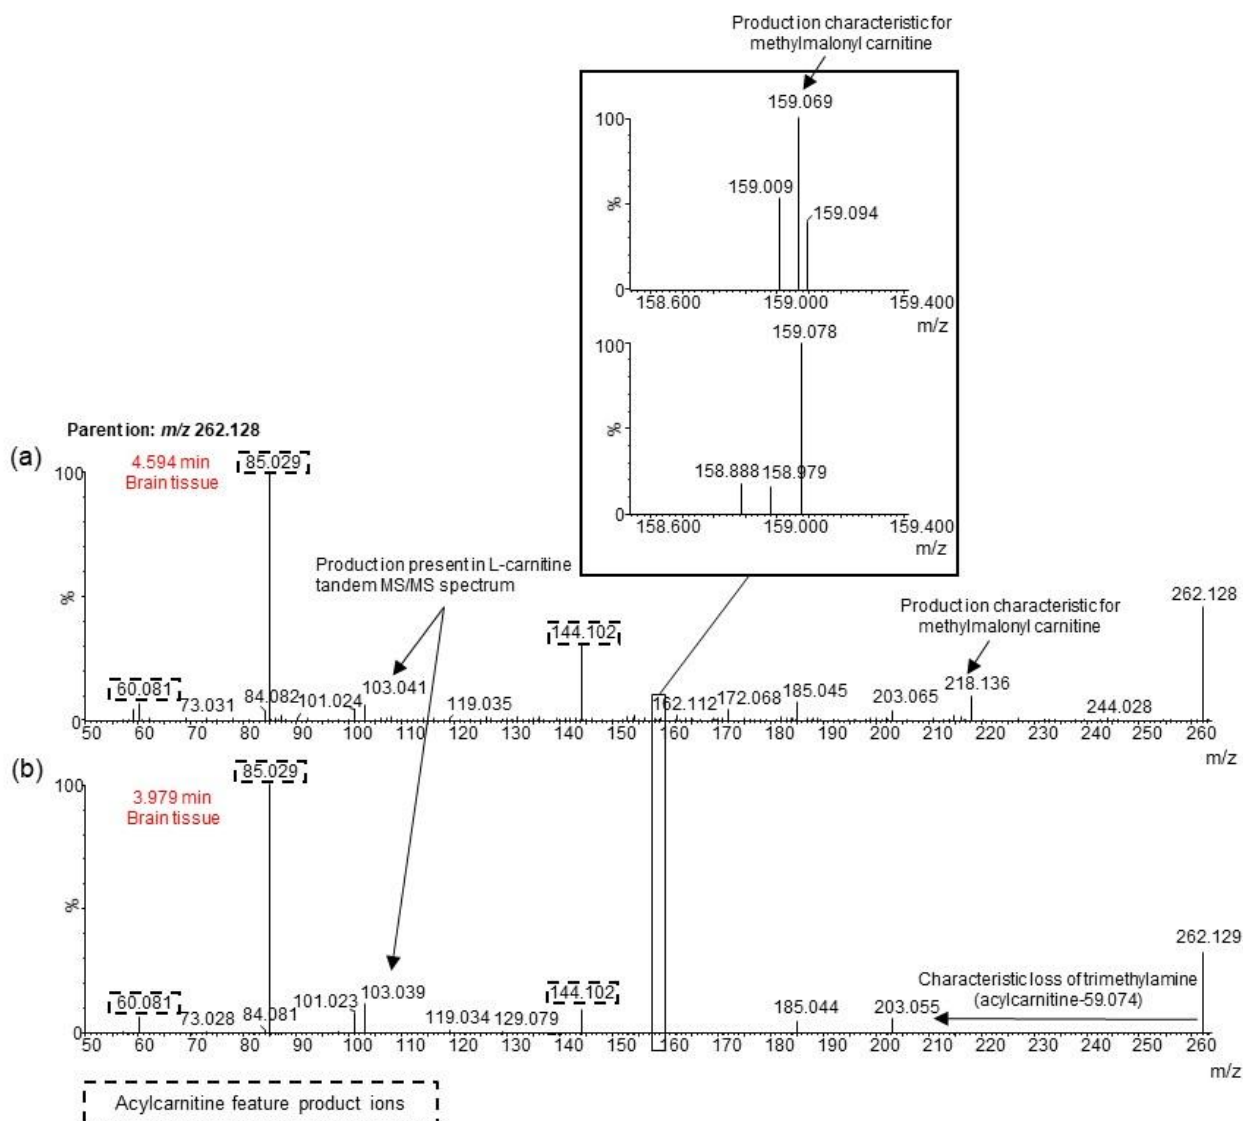

**Supplementary Figure 17. Tandem MS/MS spectra for the structural validation of the  $m/z$  262.128 acylcarnitines in positive ionization mode.** Pooled brain tissue was used for the UPLC-MS/MS analysis and spectra acquired at 20 eV. The structure assignment was based on previous experimental data (1, 2).

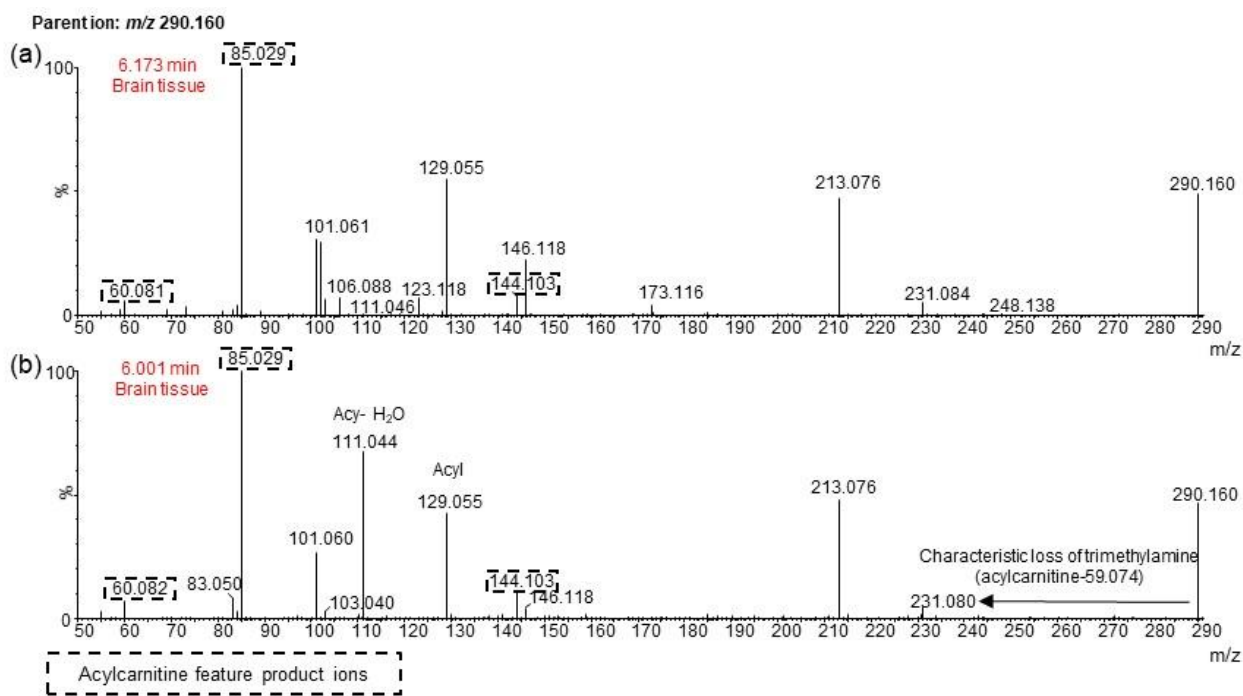

**Supplementary Figure 18. Tandem MS/MS spectra for the structural validation of the  $m/z$  290.160 acylcarnitines in positive ionization mode.** Pooled brain tissue was used for the UPLC-MS/MS analysis and spectra acquired at 20 eV. The structure assignment was based on previous experimental data (1, 2).

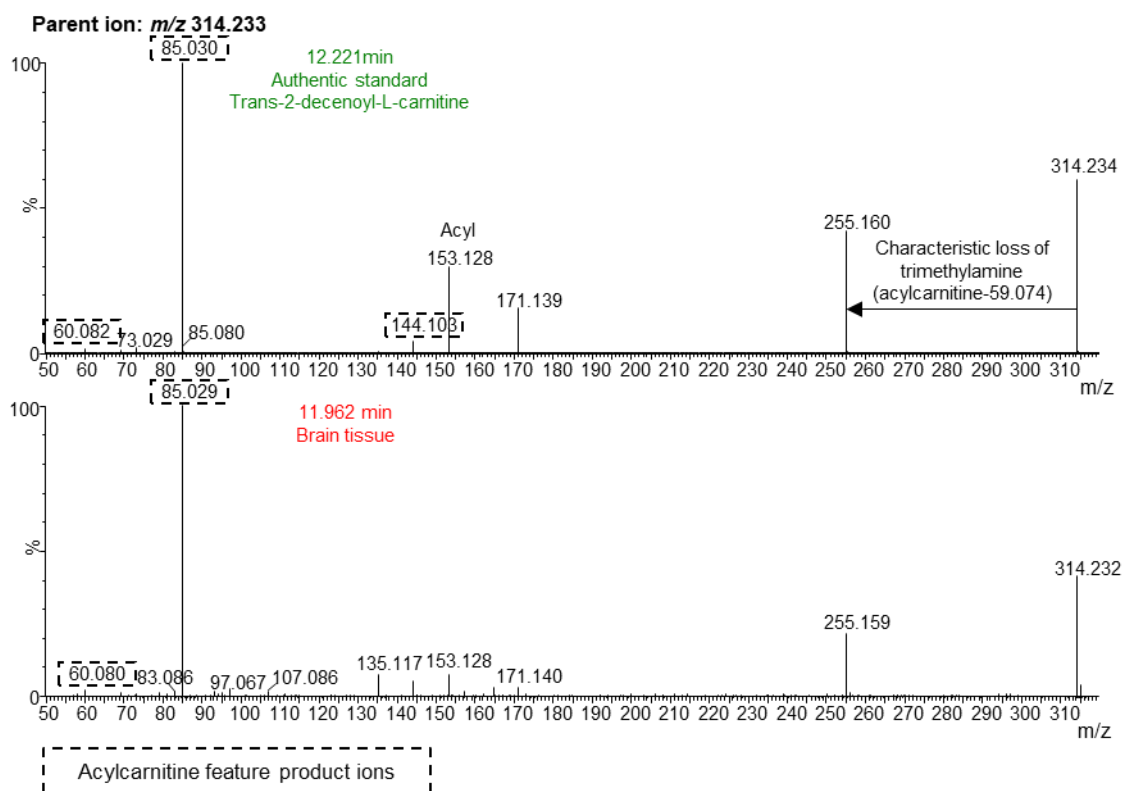

**Supplementary Figure 19. Tandem MS/MS spectra for the structural validation of the  $m/z$  314.233 acylcarnitine in positive ionization mode.** Pooled brain tissue was used for the UPLC-MS/MS analysis and spectra acquired at 20 eV. The structure assignment was based on previous experimental data (1, 2).

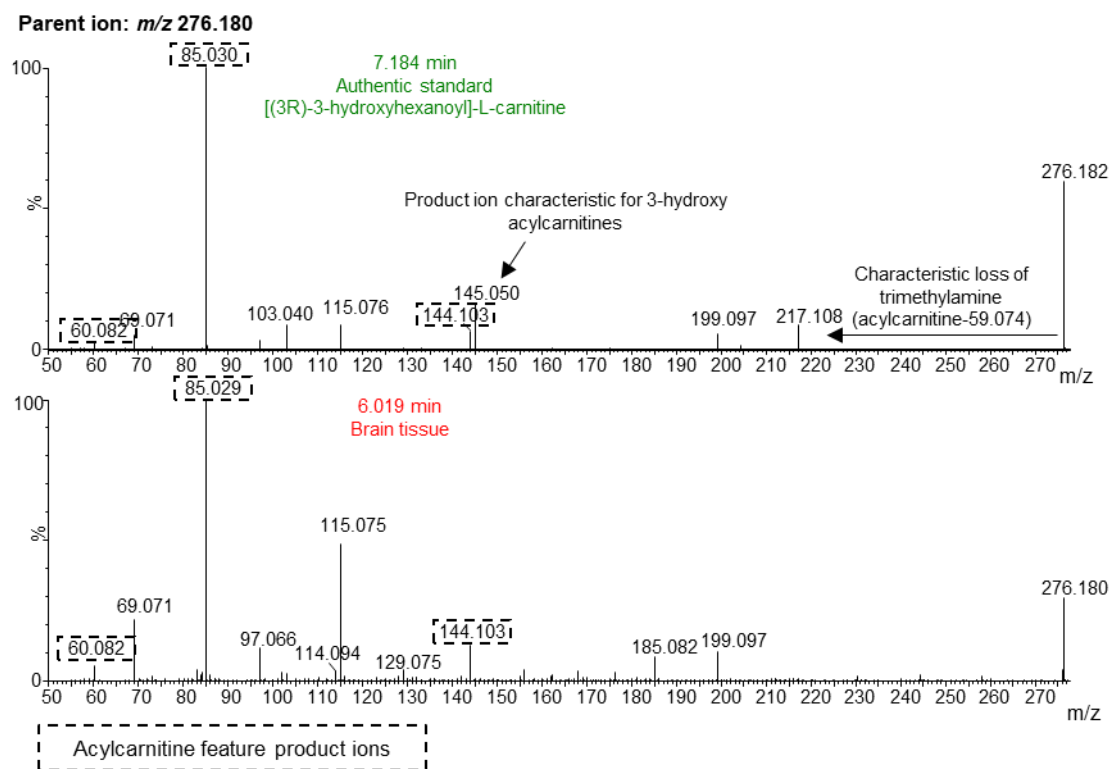

**Supplementary Figure 20. Tandem MS/MS spectra for the structural validation of the  $m/z$  276.180 acylcarnitine in positive ionization mode.** Pooled brain tissue was used for the UPLC-MS/MS analysis and spectra acquired at 20 eV. The structure assignment was based on previous experimental data (1, 2).

Hydroxyoctadecanoic acid (Metlin ID: 35432)

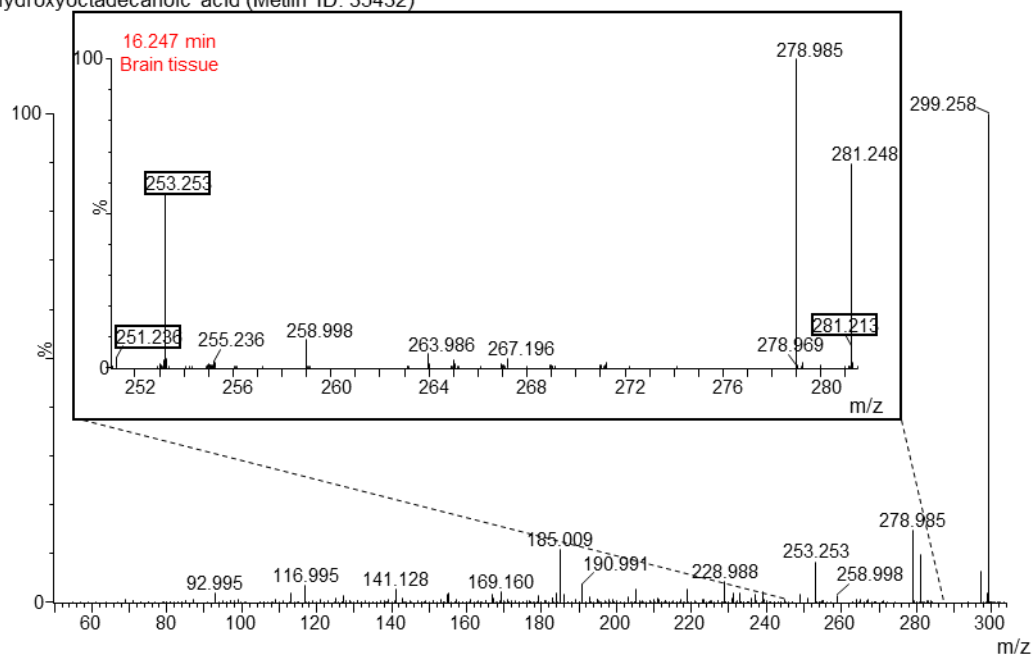

**Supplementary Figure 21. Tandem MS/MS spectra for the structural validation of hydroxyoctadecanoic acid in negative ionization mode.** Pooled brain tissue was used for the UPLC-MS/MS analysis and spectra acquired at 30 eV. The acquired MS/MS spectra were compared to experimental MS/MS spectra available in the Metlin database and common product ions are annotated with a black rectangle. Metlin ID numbers are provided.

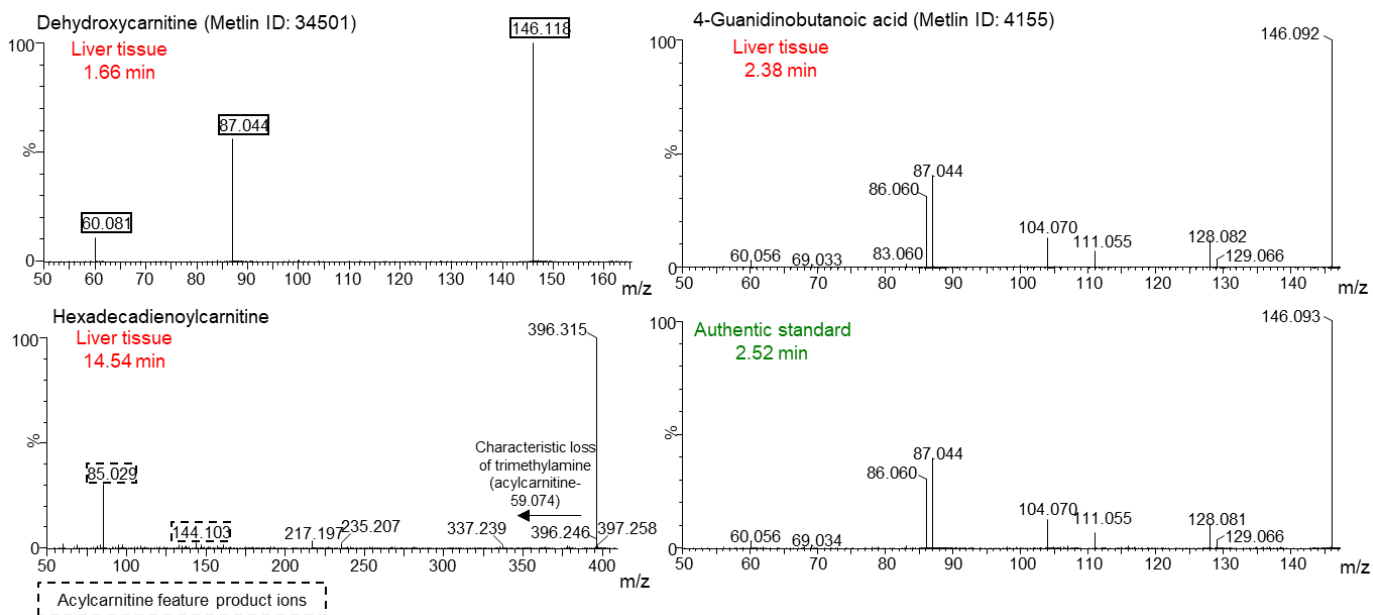

**Supplementary Figure 22. Tandem MS/MS spectra for the structural validation of representative significantly altered liver metabolites in positive ionization mode.** Pooled liver tissue was used for the UPLC-MS/MS analysis and spectra acquired at 10 eV. The acquired MS/MS spectra were compared to experimental MS/MS spectra available in the Metlin database and common product ions are annotated with a black rectangle. In the case of 4-Guanidinobutanoic acid, the acquired MS/MS spectra were compared to MS/MS spectra collected in authentic standards. Metlin ID numbers are provided.



## Supplementary Tables

**Supplementary Table 1. Evaluation of the isotope labeled internal standard in the metabolomics analysis.** Values for the internal standard (C-13 isotopically labeled phenylalanine) in the quality control (QC) samples in positive (POS) and negative (NEG) ionization mode.

|                                       | <b>POS</b>           | <b>NEG</b>          |
|---------------------------------------|----------------------|---------------------|
| <b>Average peak area (a.u.)</b>       | 4590290              | 3413293             |
| <b>Standard deviation</b>             | 1272127              | 295215              |
| <b>%CV</b>                            | 27.71                | 8.65                |
| <b>RT (<math>\pm</math>SEM) (min)</b> | 6.156 ( $\pm$ 0.005) | 6.181( $\pm$ 0.005) |

**Supplementary Table 2. Structure validation of the brain metabolites presented in Figure 1 and Supplementary Figure 3.**

|                             | <i>m/z</i> experimental | <i>m/z</i> theoretical | ppm    | <sup>a</sup> Ionization mode | Rt brain tissue (min) | Rt authentic standard (min) | MS/MS | Confidence level* |
|-----------------------------|-------------------------|------------------------|--------|------------------------------|-----------------------|-----------------------------|-------|-------------------|
| Choline                     | 104.107                 | 104.1075               | 4.80   | POS                          | 1.41                  | 1.41                        | 20 eV | 2a                |
| Betaine                     | 118.086                 | 118.0862               | -1.69  | POS                          | 1.46                  | 1.49                        |       | 2a                |
| Citicoline                  | 489.113                 | 489.1146               | -3.27  | POS                          | 1.70                  |                             | 20 eV | 2a                |
| L-carnitine                 | 162.113                 | 162.1124               | 3.70   | POS                          | 1.45                  | 1.45                        | 20 eV | 2a                |
| Serotonin                   | 177.102                 | 177.1022               | -1.13  | POS                          | 5.45                  | 5.64                        | 20 eV | 1                 |
| Creatine                    | 132.078                 | 132.0768               | 9.09   | POS                          | 1.56                  | 1.57                        | 20 eV | 2a                |
| Melanin                     | 319.069                 | 319.0713               | -7.21  | POS                          | 14.30                 |                             | 10 eV | 2a                |
| Aspartate                   | 132.028                 | 132.0302               | -16.66 | NEG                          | 1.36                  | 1.34                        | 20 eV | 1                 |
| Glutamate                   | 146.045                 | 146.0458               | -5.48  | NEG                          | 1.42                  | 1.40                        | 20 eV | 1                 |
| Glutamine                   | 145.060                 | 145.0618               | -12.41 | NEG                          | 1.36                  | 1.34                        | 20 eV | 2a                |
| Gluconic acid               | 195.049                 | 195.0510               | -10.25 | NEG                          | 1.44                  | 1.44                        | 20 eV | 2a                |
| Orotate                     | 155.007                 | 155.0098               | -18.06 | NEG                          | 2.14                  | 2.31                        | 20 eV | 2a                |
| cAMP                        | 328.044                 | 328.0452               | -3.66  | NEG                          | 5.62                  | 5.72                        | 20 eV | 2a                |
| Tryptophan                  | 203.081                 | 203.0826               | -7.88  | NEG                          | 7.26                  | 7.39                        | 20 eV | 1                 |
| <i>N</i> -acetyl-tryptophan | 245.092                 | 245.0931               | -4.49  | NEG                          | 9.74                  | 10.02                       | 20 eV | 1                 |
| Adenosine                   | 266.088                 | 266.0895               | -5.64  | NEG                          | 5.40                  | 5.42                        | 20 eV | 1                 |
| AMP                         | 346.058                 | 346.0558               | 6.36   | NEG                          | 3.12                  | 3.18                        | 20 eV | 2a                |
| ADP                         | 426.020                 | 426.0221               | -4.93  | NEG                          | 4.68                  | 4.73                        | 20 eV | 2a                |
| Uric acid                   | 167.019                 | 167.0210               | -11.97 | NEG                          | 3.36                  | 3.40                        | 20 eV | 2a                |
| <i>N</i> -acetyl-methionine | 190.052                 | 190.0543               | 12.10  | NEG                          | 7.54                  | 7.80                        | 20 eV | 2a                |

|                  |         |          |        |     |      |      |       |    |
|------------------|---------|----------|--------|-----|------|------|-------|----|
| Ascorbic acid    | 175.023 | 175.0248 | -10.28 | NEG | 2.09 | 2.15 | MSE   | 2a |
| Pantothenic acid | 218.102 | 218.1033 | -5.96  | NEG | 6.71 | 6.67 | 10 eV | 2a |

a: POS, positive ionization mode; NEG, negative ionization mode

\*Confidence level: *Level 1*- the proposed structure has been confirmed via appropriate measurement of an authentic reference standard with MS, MS/MS and retention time matching; *Level 2a*- matching literature or library tandem MS/MS spectrum data where the spectrum-structure match is unambiguous (3, 4).

**Supplementary Table 3.** Statistical data of the sleep-wake effects on the illustrated brain metabolites in individual brain regions. Two tailed unpaired *t*-test.

|                                     | <i>t</i> - score | <i>P</i>    | Log <sub>10</sub> FC |
|-------------------------------------|------------------|-------------|----------------------|
| CBL_Acetyltryptophan                | 1.1856           | 0.2632      | 0.057                |
| CBL_Adipoyl/methylglutarylcarnitine | 1.868            | 0.091303    | 0.057                |
| CBL_ADP                             | -0.029155        | 0.97731     | -0.004               |
| CBL_alpha-GPC                       | 0.6724           | 0.51656     | 0.021                |
| CBL_AMP                             | 1.7501           | 0.11067     | 0.036                |
| CBL_Aspartate                       | -1.5226          | 0.15883     | -0.072               |
| CBL_beta citryl glutamate           | 1.8396           | 0.09566     | 0.105                |
| CBL_Betaine                         | 1.1066           | 0.29437     | 0.052                |
| CBL_cAMP                            | 2.5015           | 0.031368    | 0.098                |
| CBL_Choline                         | 1.009            | 0.33677     | 0.036                |
| CBL_Citicoline                      | -0.80921         | 0.43722     | -0.022               |
| CBL_Creatine                        | -0.18554         | 0.85651     | -0.007               |
| CBL_Decenoylcarnitine               | 4.1394           | 0.0020136   | 0.158                |
| CBL_Ergothioneine                   | -3.6535          | 0.0044368   | -0.121               |
| CBL_Gluconic acid                   | -2.3004          | 0.044221    | -0.024               |
| CBL_Glutamate                       | -0.23819         | 0.81655     | -0.004               |
| CBL_Glutamine                       | 1.2635           | 0.23506     | 0.025                |
| CBL_Glutathione                     | -2.2868          | 0.045262    | -0.362               |
| CBL_Homovanillic                    | 0.089854         | 0.93018     | 0.002                |
| CBL_Hydroxydecanoylcarnitine        | 3.4775           | 0.0059461   | 0.141                |
| CBL_Hydroxydodecanoylcarnitine      | 3.6465           | 0.0044884   | 0.151                |
| CBL_Hydroxyhexanoylcarnitine        | 1.5012           | 0.16421     | 0.127                |
| CBL_Hydroxyoctadecanoic acid        | 5.3826           | 0.00030894  | 0.218                |
| CBL_Hydroxyphenyllactic             | 2.0313           | 0.069657    | 0.106                |
| CBL_Hydroxytetradecadiencarnitine   | 3.3153           | 0.0078096   | 0.376                |
| CBL_Isomer A                        | 3.2123           | 0.0092951   | 0.080                |
| CBL_L-carnitine                     | 1.2094           | 0.25433     | 0.024                |
| CBL_Melanin                         | 3.347            | 0.0074033   | 0.152                |
| CBL_NAAG                            | 0.67011          | 0.51796     | 0.017                |
| CBL_N-acetylaspartate               | -0.0040951       | 0.99681     | 0.000                |
| CBL_N-Acetyl-L-methionine           | 0.69493          | 0.50293     | 0.066                |
| CBL_Orotic acid                     | -1.3933          | 0.19371     | -0.071               |
| CBL_Oxidized glutathione            | 2.5298           | 0.029881    | 0.049                |
| CBL_Phenylalanine                   | 0.60428          | 0.55912     | 0.019                |
| CBL_Phenyllactic acid               | 1.4947           | 0.16587     | 0.091                |
| CBL_SAM                             | -2.3102          | 0.043491    | -0.066               |
| CBL_Serotonin                       | 0.16717          | 0.87057     | 0.007                |
| CBL_S-lactoyl glutathione           | 3.0801           | 0.011638    | 0.269                |
| CBL_Succinylcarnitine               | -3.2086          | 0.0093536   | -0.521               |
| CBL_Tetradecadiencarnitine          | 6.5568           | 0.000064176 | 0.336                |
| CBL_Tryptophan                      | 1.4292           | 0.18343     | 0.059                |

|                                     |          |            |        |
|-------------------------------------|----------|------------|--------|
| CBL_Tyrosine                        | -1.355   | 0.20523    | -0.072 |
| CBL_Uric acid                       | -0.93542 | 0.37161    | -0.051 |
| CTX_Acetyltryptophan                | 1.5156   | 0.16057    | 0.088  |
| CTX_Adipoyl/methylglutarylcarnitine | 2.857    | 0.017044   | 0.113  |
| CTX_ADP                             | -0.41271 | 0.68853    | -0.039 |
| CTX_alpha-GPC                       | -1.004   | 0.33904    | -0.072 |
| CTX_AMP                             | 1.9159   | 0.084384   | 0.096  |
| CTX_Aspartate                       | -2.3646  | 0.03964    | -0.143 |
| CTX_beta citryl glutamate           | -2.8381  | 0.017604   | -0.138 |
| CTX_Betaine                         | -1.2469  | 0.24086    | -0.069 |
| CTX_cAMP                            | 2.8721   | 0.016608   | 0.413  |
| CTX_Choline                         | -0.92517 | 0.37666    | -0.071 |
| CTX_Citicoline                      | -3.6455  | 0.0044955  | -0.098 |
| CTX_Creatine                        | 0.038935 | 0.96971    | 0.001  |
| CTX_Decenoylcarnitine               | 4.1227   | 0.0020682  | 0.307  |
| CTX_Ergothioneine                   | -1.3822  | 0.197      | -0.062 |
| CTX_Gluconic acid                   | -0.37499 | 0.7155     | -0.009 |
| CTX_Glutamate                       | 1.3794   | 0.19783    | 0.022  |
| CTX_Glutamine                       | 1.8625   | 0.092137   | 0.054  |
| CTX_Glutathione                     | -0.52707 | 0.60964    | -0.145 |
| CTX_Homovanillic                    | 3.4319   | 0.006418   | 0.161  |
| CTX_Hydroxydecanoylcarnitine        | 3.6597   | 0.0043911  | 0.225  |
| CTX_Hydroxydodecanoylcarnitine      | 3.8429   | 0.0032499  | 0.273  |
| CTX_Hydroxyhexanoylcarnitine        | 0.09276  | 0.92793    | 0.005  |
| CTX_Hydroxyoctadecanoic acid        | 4.6996   | 0.00084213 | 0.451  |
| CTX_Hydroxyphenyllactic             | 3.9855   | 0.0025779  | 0.141  |
| CTX_Hydroxytetradecadiencarnitine   | 4.2088   | 0.0018032  | 0.313  |
| CTX_Isomer A                        | 5.0562   | 0.00049471 | 0.747  |
| CTX_L-carnitine                     | -0.22685 | 0.82511    | -0.007 |
| CTX_Melanin                         | 1.9516   | 0.079535   | 0.162  |
| CTX_NAAG                            | 0.69005  | 0.50586    | 0.038  |
| CTX_N-acetylaspartate               | 2.9224   | 0.015238   | 0.113  |
| CTX_N-Acetyl-L-methionine           | 1.6892   | 0.12206    | 0.175  |
| CTX_Orotic acid                     | 1.423    | 0.18519    | 0.077  |
| CTX_Oxidized glutathione            | 2.3949   | 0.03764    | 0.052  |
| CTX_Phenylalanine                   | 0.42494  | 0.67988    | 0.010  |
| CTX_Phenyllactic acid               | 2.8636   | 0.016852   | 0.132  |
| CTX_SAM                             | -3.7786  | 0.0036104  | -0.232 |
| CTX_Serotonin                       | -1.2195  | 0.25064    | -0.349 |
| CTX_S-lactoyl glutathione           | 2.0881   | 0.063327   | 0.656  |
| CTX_Succinylcarnitine               | -1.529   | 0.15726    | -0.735 |
| CTX_Tetradecadiencarnitine          | 4.7914   | 0.00073305 | 0.333  |
| CTX_Tryptophan                      | 1.7928   | 0.10326    | 0.057  |
| CTX_Tyrosine                        | 0.12121  | 0.90593    | 0.010  |

|                                     |           |           |        |
|-------------------------------------|-----------|-----------|--------|
| CTX_Uric acid                       | -0.19457  | 0.84963   | -0.022 |
| HC_Acetyltryptophan                 | -0.71185  | 0.49283   | -0.047 |
| HC_Adipoyl/methylglutaryl carnitine | 2.0714    | 0.065133  | 0.138  |
| HC_ADP                              | -0.66049  | 0.52386   | -0.062 |
| HC_alpha-GPC                        | 1.2822    | 0.2287    | 0.060  |
| HC_AMP                              | 0.62798   | 0.54409   | 0.023  |
| HC_Aspartate                        | -1.4164   | 0.18705   | -0.052 |
| HC_beta citryl glutamate            | 0.81271   | 0.43531   | 0.151  |
| HC_Betaine                          | 1.6815    | 0.12359   | 0.238  |
| HC_cAMP                             | -0.31344  | 0.76039   | -0.034 |
| HC_Choline                          | 1.1316    | 0.28423   | 0.063  |
| HC_Citicoline                       | -0.4253   | 0.67962   | -0.010 |
| HC_Creatine                         | 1.0913    | 0.30075   | 0.091  |
| HC_Decenoyl carnitine               | 2.2411    | 0.048912  | 0.233  |
| HC_Ergothioneine                    | -0.30523  | 0.76645   | -0.024 |
| HC_Gluconic acid                    | 0.96648   | 0.3566    | 0.027  |
| HC_Glutamate                        | 0.44154   | 0.66822   | 0.011  |
| HC_Glutamine                        | 0.72336   | 0.48603   | 0.017  |
| HC_Glutathione                      | 3.4188    | 0.0065608 | 0.401  |
| HC_Homovanillic                     | -0.039322 | 0.96941   | -0.001 |
| HC_Hydroxydecanoyl carnitine        | -1.2636   | 0.23505   | -0.088 |
| HC_Hydroxydodecanoyl carnitine      | 2.6536    | 0.024164  | 0.244  |
| HC_Hydroxyhexanoyl carnitine        | 3.8665    | 0.003127  | 0.341  |
| HC_Hydroxyoctadecanoic acid         | 1.798     | 0.10238   | 0.240  |
| HC_Hydroxyphenyllactic              | 1.6229    | 0.13568   | 0.095  |
| HC_Hydroxytetradecadienyl carnitine | 1.5528    | 0.15153   | 0.266  |
| HC_Isomer A                         | 1.9395    | 0.081142  | 0.082  |
| HC_L-carnitine                      | 0.75298   | 0.46882   | 0.048  |
| HC_Melanin                          | 0.80499   | 0.43954   | 0.047  |
| HC_NAAG                             | 0.83596   | 0.4227    | 0.030  |
| HC_N-acetylaspartate                | 0.59904   | 0.56247   | 0.060  |
| HC_N-Acetyl-L-methionine            | 1.6511    | 0.12974   | 0.142  |
| HC_Orotic acid                      | -1.0125   | 0.33519   | -0.136 |
| HC_Oxidized glutathione             | 1.1233    | 0.28754   | 0.028  |
| HC_Phenylalanine                    | 0.95148   | 0.36379   | 0.025  |
| HC_Phenyllactic acid                | 1.1731    | 0.26796   | 0.074  |
| HC_SAM                              | 0.36491   | 0.72278   | 0.013  |
| HC_Serotonin                        | 0.77093   | 0.45858   | 0.052  |
| HC_S-lactoyl glutathione            | 3.366     | 0.0071693 | 0.606  |
| HC_Succinyl carnitine               | 0.26367   | 0.79739   | 0.053  |
| HC_Tetradecadienyl carnitine        | 1.1826    | 0.26433   | 0.155  |
| HC_Tryptophan                       | 1.897     | 0.087049  | 0.082  |
| HC_Tyrosine                         | 0.26262   | 0.79817   | 0.013  |
| HC_Uric acid                        | 0.22032   | 0.83005   | 0.014  |

|                                      |          |          |        |
|--------------------------------------|----------|----------|--------|
| MDB_Acetyltryptophan                 | -0.73033 | 0.48195  | 0.009  |
| MDB_Adipoyl/methylglutaryl carnitine | -0.22495 | 0.82655  | 0.050  |
| MDB_ADP                              | 1.1164   | 0.29035  | 0.224  |
| MDB_alpha-GPC                        | -0.52527 | 0.61084  | 0.028  |
| MDB_AMP                              | 0.40629  | 0.69309  | 0.131  |
| MDB_Aspartate                        | -1.4729  | 0.17155  | -0.045 |
| MDB_beta citryl glutamate            | -0.72865 | 0.48293  | -0.044 |
| MDB_Betaine                          | -0.7901  | 0.4478   | -0.010 |
| MDB_cAMP                             | -0.99295 | 0.34415  | -0.057 |
| MDB_Choline                          | -0.25877 | 0.80106  | 0.047  |
| MDB_Citicoline                       | -0.62603 | 0.54532  | 0.018  |
| MDB_Creatine                         | -1.3571  | 0.20459  | -0.043 |
| MDB_Decenoyl carnitine               | 1.3626   | 0.2029   | 0.297  |
| MDB_Ergothioneine                    | -1.9732  | 0.076738 | -0.111 |
| MDB_Gluconic acid                    | -1.0804  | 0.30534  | -0.006 |
| MDB_Glutamate                        | -0.39048 | 0.70437  | 0.037  |
| MDB_Glutamine                        | -0.65972 | 0.52434  | 0.017  |
| MDB_Glutathione                      | -0.1118  | 0.91319  | 0.060  |
| MDB_Homovanillic                     | -0.57534 | 0.57778  | 0.022  |
| MDB_Hydroxydecanoyl carnitine        | 0.02921  | 0.97727  | 0.073  |
| MDB_Hydroxydodecanoyl carnitine      | 0.52903  | 0.60833  | 0.154  |
| MDB_Hydroxyhexanoyl carnitine        | 1.4846   | 0.16846  | 0.283  |
| MDB_Hydroxyoctadecanoic acid         | 0.45552  | 0.65846  | 0.131  |
| MDB_Hydroxyphenyllactic              | 0.47011  | 0.64836  | 0.112  |
| MDB_Hydroxytetradecadienyl carnitine | -0.47643 | 0.64401  | -0.009 |
| MDB_Isomer A                         | 0.72905  | 0.4827   | 0.155  |
| MDB_L-carnitine                      | -1.4793  | 0.16987  | -0.054 |
| MDB_Melanin                          | -3.1152  | 0.010963 | -0.376 |
| MDB_NAAG                             | -1.0363  | 0.32447  | -0.013 |
| MDB_N-acetylaspartate                | -0.23615 | 0.81809  | 0.004  |
| MDB_N-Acetyl-L-methionine            | -2.7163  | 0.021698 | -0.274 |
| MDB_Orotic acid                      | 0.189    | 0.85387  | 0.100  |
| MDB_Oxidized glutathione             | -1.3728  | 0.19981  | -0.032 |
| MDB_Phenylalanine                    | -0.95476 | 0.36221  | -0.002 |
| MDB_Phenyllactic acid                | -0.65239 | 0.52886  | 0.009  |
| MDB_SAM                              | -1.3617  | 0.20317  | -0.027 |
| MDB_Serotonin                        | 0.13043  | 0.89881  | 0.097  |
| MDB_S-lactoyl glutathione            | -2.1789  | 0.05435  | -0.490 |
| MDB_Succinyl carnitine               | -1.7243  | 0.11537  | -0.328 |
| MDB_Tetradecadienyl carnitine        | -0.13082 | 0.89851  | 0.053  |
| MDB_Tryptophan                       | -0.11935 | 0.90736  | 0.057  |
| MDB_Tyrosine                         | 0.10176  | 0.92096  | 0.093  |
| MDB_Uric acid                        | 1.4372   | 0.1812   | 0.294  |

*logFC: Log<sub>10</sub>(fold change); fold change = (Average sleep-state)/(Average wake-state)*

**Supplementary Table 4. Structure validation of the sulfur containing brain metabolites presented in Figure 2.** Tandem MS/MS spectra were acquired in positive ionization mode.

|                      | <i>m/z</i> experimental | <i>m/z</i> theoretical | ppm   | Rt brain tissue (min) | Rt authentic standard (min) | MS/MS | Confidence level* |
|----------------------|-------------------------|------------------------|-------|-----------------------|-----------------------------|-------|-------------------|
| Glutathione          | 308.092                 | 308.0911               | 2.92  | 2.8                   | 2.8                         | 20 eV | 1                 |
| Oxidized glutathione | 613.163                 | 613.1592               | 6.20  | 4.92                  | 5.07                        | 20 eV | 1                 |
| SAM                  | 399.144                 | 399.145                | -2.51 | 1.49                  | 1.51                        | 20 eV | 1                 |
| S-lactoylglutathione | 380.112                 | 380.1122               | -0.53 | 5.29                  |                             | 20 eV | 2a                |

\*Confidence level: Level 1- the proposed structure has been confirmed via appropriate measurement of an authentic reference standard with MS, MS/MS and retention time matching; Level 2a- matching literature or library tandem MS/MS spectrum data where the spectrum-structure match is unambiguous (3, 4).



**Supplementary Table 5. Structure validation of the brain metabolites presented in Figure 3.** Tandem MS/MS spectra were acquired in negative ionization mode.

|                           | <i>m/z</i> experimental | <i>m/z</i> theoretical | ppm   | Rt brain tissue (min) | Rt authentic standard (min) | MS/MS | Confidence level* |
|---------------------------|-------------------------|------------------------|-------|-----------------------|-----------------------------|-------|-------------------|
| NAAG                      | 303.082                 | 303.0834               | -4.62 | 4.78                  |                             | 20eV  | 2a                |
| <i>N</i> -acetylaspartate | 174.040                 | 174.0408               | -4.60 | 2.75                  | 2.80                        |       | 2a                |

\*Confidence level: *Level 1*- the proposed structure has been confirmed via appropriate measurement of an authentic reference standard with MS, MS/MS and retention time matching; *Level 2a*- matching literature or library tandem MS/MS spectrum data where the spectrum-structure match is unambiguous (3, 4).

**Supplementary Table 6. Structure validation of the phenylalanine and tyrosine brain metabolites presented in Figure 4.** Tandem MS/MS spectra were acquired in negative ionization mode.

|                          | <i>m/z</i> experimental | <i>m/z</i> theoretical | ppm    | Rt brain tissue (min) | Rt authentic standard (min) | MS/MS | Confidence level* |
|--------------------------|-------------------------|------------------------|--------|-----------------------|-----------------------------|-------|-------------------|
| Tyrosine                 | 180.065                 | 180.0665               | -8.33  | 4.58                  | 4.72                        | 20 eV | 1                 |
| Phenylalanine            | 164.070                 | 164.0716               | -9.75  | 6.16                  | 6.16                        | 20 eV | 1                 |
| Phenyllactic acid        | 165.054                 | 165.0556               | -9.69  | 9.68                  | 9.74                        | 20 eV | 1                 |
| Hydroxyphenyllactic acid | 181.049                 | 181.0506               | -8.84  | 7.45                  | 7.75                        | 20 eV | 1                 |
| Homovanillic acid        | 181.048                 | 181.0506               | -14.36 | 8.62                  | 8.65                        | 20 eV | 1                 |

\*Confidence level: *Level 1*- the proposed structure has been confirmed via appropriate measurement of an authentic reference standard with MS, MS/MS and retention time matching; *Level 2a*- matching literature or library tandem MS/MS spectrum data where the spectrum-structure match is unambiguous (3, 4).

**Supplementary Table 7. Structure validation of the acylcarnitines presented in Figure 5.**

|                                   | <i>m/z</i> experimental | <i>m/z</i> theoretical | ppm   | Ionization mode | Rt brain tissue (min) | Rt authentic standard (min) | MS/MS | Confidence level* |
|-----------------------------------|-------------------------|------------------------|-------|-----------------|-----------------------|-----------------------------|-------|-------------------|
| Succinylcarnitine                 | 262.128                 | 262.1285               | -1.91 | POS             | 4.08                  |                             | 20eV  | 2a                |
| 2-Hydroxyhexanoylcarnitine        | 276.180                 | 276.1805               | -1.81 | POS             | 6.00                  |                             | 20eV  | 2a                |
| Adipoyl/methylglutaryl carnitine  | 290.159                 | 290.1598               | -2.76 | POS             | 5.98                  |                             | 20eV  | 2a                |
| Decenoylcarnitine                 | 314.233                 | 314.2326               | 1.27  | POS             | 12.01                 | 12.27                       | 20eV  | 1                 |
| 3-Hydroxydecanoylcarnitine        | 332.243                 | 332.2431               | -0.30 | POS             | 11.64                 |                             | 20eV  | 2a                |
| Hydroxydodecanoylcarnitine        | 360.275                 | 360.2744               | 1.67  | POS             | 12.08                 |                             | 20eV  | 2a                |
| Tetradecadienylcarnitine          | 368.283                 | 368.2795               | 9.50  | POS             | 13.55                 |                             | 20eV  | 2a                |
| 3-Hydroxytetradecadienylcarnitine | 384.276                 | 384.2744               | 4.16  | POS             | 12.91                 |                             | 20eV  | 2a                |
| Hydroxyoctadecanoic acid          | 299.258                 | 299.2592               | -4.01 | NEG             | 16.07                 |                             | 30eV  | 2a                |

a: POS, positive ionization mode; NEG, negative ionization mode

\*Confidence level: *Level 1*- the proposed structure has been confirmed via appropriate measurement of an authentic reference standard with MS, MS/MS and retention time matching; *Level 2a*- matching literature or library tandem MS/MS spectrum data where the spectrum-structure match is unambiguous (3, 4).

**Supplementary Table 8. Two-way ANOVA results of the illustrated brain metabolites.**

|                            | <i>F</i> -statistic sleep-wake effect | <i>P</i> value (raw) | FDR     | <i>F</i> -statistic brain region effect | <i>P</i> value (raw) | FDR      | <i>F</i> -statistic interaction | <i>P</i> value (raw) | FDR     |
|----------------------------|---------------------------------------|----------------------|---------|-----------------------------------------|----------------------|----------|---------------------------------|----------------------|---------|
| Citryl glutamate isomer A  | 27.79                                 | 0.00001              | 0.00114 | 47.51                                   | 4.29E-13             | 5.85E-12 | 24.47                           | 4.51E-09             | 0.00002 |
| Homovanillic acid          | 10.34                                 | 0.00262              | 0.11950 | 50.92                                   | 1.48E-13             | 2.24E-12 | 7.84                            | 0.00033              | 0.04194 |
| Hydroxyphenyllactic acid   | 26.48                                 | 0.00001              | 0.00159 | 53.66                                   | 6.58E-14             | 1.09E-12 | 2.23                            | 0.09983              | 0.39346 |
| Aspartate                  | 8.98                                  | 0.00473              | 0.16384 | 81.32                                   | 7.80E-17             | 2.67E-15 | 0.07                            | 0.97602              | 0.99522 |
| Glutamine                  | 4.14                                  | 0.04873              | 0.43054 | 10.05                                   | 0.00005              | 0.00011  | 0.44                            | 0.72725              | 0.89176 |
| Choline                    | 1.00                                  | 0.32368              | 0.77344 | 13.92                                   | 2.56E-06             | 0.00001  | 1.30                            | 0.28818              | 0.61582 |
| Glutamate                  | 2.76                                  | 0.10486              | 0.55945 | 9.61                                    | 0.00007              | 0.00015  | 0.68                            | 0.56984              | 0.80624 |
| Gluconic acid              | 0.20                                  | 0.65651              | 0.91483 | 78.49                                   | 1.41E-16             | 4.48E-15 | 1.39                            | 0.26155              | 0.59097 |
| L-carnitine                | 0.10                                  | 0.75436              | 0.94486 | 89.12                                   | 1.67E-17             | 6.85E-16 | 1.06                            | 0.37600              | 0.68500 |
| Creatine                   | 0.19                                  | 0.66809              | 0.91906 | 1.97                                    | 0.13454              | 0.15388  | 1.00                            | 0.40516              | 0.70506 |
| Orotate                    | 0.15                                  | 0.70071              | 0.92727 | 20.61                                   | 3.65E-08             | 1.57E-07 | 1.69                            | 0.18594              | 0.51119 |
| Adenosine                  | 1.659                                 | 0.2054               | 0.330   | 18.27                                   | 0.0001               | 8.43E-4  | 3.560                           | 0.0227               | 0.1316  |
| AMP                        | 8.75                                  | 0.00525              | 0.17011 | 10.87                                   | 0.00003              | 0.00006  | 0.87                            | 0.46550              | 0.74438 |
| Uric acid                  | 0.69                                  | 0.40966              | 0.82199 | 4.98                                    | 0.00506              | 0.00763  | 2.00                            | 0.12978              | 0.43778 |
| ADP                        | 0.03                                  | 0.87141              | 0.97041 | 4.75                                    | 0.00645              | 0.00956  | 0.70                            | 0.55549              | 0.79750 |
| Serotonin                  | 0.16                                  | 0.69111              | 0.92404 | 6.30                                    | 0.00136              | 0.00228  | 1.26                            | 0.30215              | 0.62734 |
| cAMP                       | 8.23                                  | 0.00662              | 0.19043 | 10.08                                   | 0.00005              | 0.00010  | 5.44                            | 0.00318              | 0.10660 |
| Tryptophan                 | 10.85                                 | 0.00211              | 0.10500 | 55.16                                   | 4.27E-14             | 7.35E-13 | 0.12                            | 0.94984              | 0.98794 |
| <i>N</i> -acetyltryptophan | 3.18                                  | 0.08255              | 0.51905 | 55.73                                   | 3.63E-14             | 6.33E-13 | 1.22                            | 0.31700              | 0.64036 |
| Melanin                    | 0.96                                  | 0.33256              | 0.77946 | 24.55                                   | 4.33E-09             | 2.28E-08 | 9.49                            | 0.00008              | 0.01991 |
| Betaine                    | 0.83                                  | 0.36751              | 0.80132 | 46.96                                   | 5.12E-13             | 6.87E-12 | 1.54                            | 0.21908              | 0.54814 |
| Citicoline                 | 3.61                                  | 0.06483              | 0.47575 | 5.69                                    | 0.00249              | 0.00396  | 1.01                            | 0.39981              | 0.70172 |
| <i>N</i> -acetylmethionine | 1.92                                  | 0.17358              | 0.64775 | 17.02                                   | 3.18E-07             | 1.10E-06 | 2.95                            | 0.04471              | 0.28522 |
| Ascorbic acid              | 1.42                                  | 0.24063              | 0.71466 | 3.37                                    | 0.02806              | 0.03683  | 1.32                            | 0.28015              | 0.60849 |
| Pantothenic acid           | 0.19                                  | 0.66546              | 0.91810 | 87.32                                   | 2.35E-17             | 9.29E-16 | 0.05                            | 0.98627              | 0.99720 |
| Ergothioneine              | 13.52                                 | 0.00071              | 0.05348 | 75.63                                   | 2.62E-16             | 7.76E-15 | 2.42                            | 0.08068              | 0.35945 |

|                                   |       |         |         |        |          |          |      |         |         |
|-----------------------------------|-------|---------|---------|--------|----------|----------|------|---------|---------|
| Glutathione                       | 0.27  | 0.60413 | 0.89859 | 3.57   | 0.02241  | 0.03002  | 5.18 | 0.00413 | 0.11693 |
| Oxidized glutathione              | 5.60  | 0.02306 | 0.33037 | 4.32   | 0.01012  | 0.01447  | 2.32 | 0.09025 | 0.37710 |
| SAM                               | 14.24 | 0.00054 | 0.04342 | 82.26  | 6.43E-17 | 2.25E-15 | 3.09 | 0.03792 | 0.26705 |
| S-lactoyl glutathione             | 12.54 | 0.00105 | 0.06815 | 65.55  | 2.72E-15 | 6.21E-14 | 7.23 | 0.00057 | 0.05324 |
| $\beta$ -citryl glutamate         | 0.01  | 0.90490 | 0.97830 | 21.92  | 1.75E-08 | 8.10E-08 | 2.17 | 0.10668 | 0.40410 |
| NAAG                              | 0.24  | 0.62948 | 0.90645 | 96.38  | 4.39E-18 | 2.10E-16 | 0.28 | 0.84268 | 0.94581 |
| N-acetylasparatate                | 1.03  | 0.31695 | 0.76967 | 5.19   | 0.00409  | 0.00627  | 0.25 | 0.85890 | 0.95352 |
| Phenylalanine                     | 0.82  | 0.37174 | 0.80390 | 142.82 | 4.50E-21 | 4.81E-19 | 0.10 | 0.95986 | 0.99077 |
| Tyrosine                          | 0.03  | 0.87007 | 0.97038 | 1.65   | 0.19450  | 0.21548  | 0.65 | 0.59002 | 0.81701 |
| Phenyllactic acid                 | 9.47  | 0.00381 | 0.14415 | 30.89  | 2.14E-10 | 1.53E-09 | 2.02 | 0.12665 | 0.43255 |
| Succinylcarnitine                 | 11.28 | 0.00176 | 0.09441 | 5.55   | 0.00287  | 0.00452  | 2.60 | 0.06585 | 0.33125 |
| Adipoyl-methylglutaryl carnitine  | 10.18 | 0.00280 | 0.12492 | 16.85  | 3.55E-07 | 1.21E-06 | 0.68 | 0.56708 | 0.80436 |
| Decenoylcarnitine                 | 35.42 | 0.00000 | 0.00018 | 3.06   | 0.03939  | 0.05023  | 0.31 | 0.81710 | 0.93507 |
| Tetradecadienylcarnitine          | 17.88 | 0.00014 | 0.01725 | 1.25   | 0.30436  | 0.32539  | 2.01 | 0.12782 | 0.43455 |
| 2-hydroxyhexanoylcarnitine        | 16.00 | 0.00027 | 0.02785 | 7.73   | 0.00036  | 0.00067  | 2.62 | 0.06421 | 0.32785 |
| 3-hydroxydecanoylcarnitine        | 10.56 | 0.00238 | 0.11356 | 6.90   | 0.00078  | 0.00136  | 5.45 | 0.00317 | 0.10660 |
| Hydroxydodecanoylcarnitine        | 23.52 | 0.00002 | 0.00350 | 3.89   | 0.01595  | 0.02199  | 0.28 | 0.83991 | 0.94494 |
| 3-hydroxytetradecadienylcarnitine | 9.08  | 0.00452 | 0.15944 | 3.21   | 0.03334  | 0.04313  | 1.55 | 0.21653 | 0.54622 |
| Hydroxyoctadecanoic acid          | 21.00 | 0.00005 | 0.00693 | 5.38   | 0.00338  | 0.00526  | 1.25 | 0.30497 | 0.63010 |

FDR: false discovery rate (adjusted *P* value)

**Supplementary Table 9. Statistical data of the illustrated metabolites in plasma.**

|                            | <i>m/z</i> | <b>Rt (min)</b> | <b>Mode</b> | <i>P</i> value | <b>t-score</b> | <b>CI (95%)</b>       |
|----------------------------|------------|-----------------|-------------|----------------|----------------|-----------------------|
| Choline                    | 104.106    | 1.45            | POS         | 0.7149         | 0.3759         | -0.2757 to 0.1961     |
| Betaine                    | 118.086    | 1.49            | POS         | 0.4816         | 0.7309         | -0.6984 to 0.3534     |
| L-carnitine                | 162.113    | 1.51            | POS         | 0.6147         | 0.5196         | -3.075 to 1.912       |
| Serotonin                  | 177.101    | 5.67            | POS         | 0.3473         | 0.9863         | -0.07081 to 0.1833    |
| Creatine                   | 132.077    | 1.63            | POS         | 0.4816         | 0.7310         | -4.088 to 2.068       |
| Aspartate                  | 132.029    | 1.28            | NEG         | 0.9538         | 0.05938        | -0.008721 to 0.009199 |
| Glutamate                  | 146.045    | 1.42            | NEG         | 0.4702         | 0.7506         | -0.03144 to 0.01560   |
| Glutamine                  | 145.060    | 1.39            | NEG         | 0.2048         | 1.356          | -0.08427 to 0.02049   |
| Gluconic acid              | 195.050    | 1.42            | NEG         | 0.6554         | 0.4599         | -0.2851 to 0.1876     |
| Orotate                    | 155.008    | 2.26            | NEG         | 0.6956         | 0.4028         | -0.002736 to 0.001898 |
| cAMP                       | 328.044    | 5.76            | NEG         | 0.1651         | 1.498          | -0.03798 to 0.007445  |
| Tryptophan                 | 203.082    | 7.34            | NEG         | 0.7171         | 0.3728         | -3.819 to 2.724       |
| <i>N</i> -acetyltryptophan | 245.092    | 9.90            | NEG         | 0.8697         | 0.1683         | -0.4399 to 0.5118     |
| <i>N</i> -acetylmethionine | 190.053    | 7.55            | NEG         | 0.9337         | 0.08528        | -0.2568 to 0.2379     |
| Succinylcarnitine          | 262.128    | 4.17            | POS         | 0.4689         | 0.7528         | -0.4296 to 0.2126     |
| Decenoylcarnitine          | 314.233    | 12.25           | POS         | 0.1499         | 1.560          | -0.0530 to 0.3003     |
| Tetradecadiencarnitine     | 368.281    | 13.77           | POS         | 0.1019         | 1.801          | -0.0288 to 0.2713     |
| 2-hydroxyhexanoylcarnitine | 276.179    | 6.15            | POS         | 0.6755         | 0.4311         | -0.1551 to 0.1048     |
| Hydroxyoctadecanoic acid   | 299.259    | 16.15           | NEG         | 0.2383         | 1.254          | -0.0532 to 0.1901     |

**Table 10. Statistical data of the illustrated metabolites in liver**

|                                           | <i>m/z</i> | Rt (min) | Mode | <i>P</i> value | t-score |
|-------------------------------------------|------------|----------|------|----------------|---------|
| 4-Guanidinobutanoic acid                  | 146.093    | 2.28     | POS  | 8.43000E-07    | -4.6986 |
| Creatine                                  | 132.077    | 1.64     | POS  | 0.00023        | 4.2631  |
| Dehydroxycarnitine                        | 146.118    | 1.67     | POS  | 0.00033        | 4.2129  |
| SAM                                       | 399.145    | 1.56     | POS  | 0.00035        | 4.2050  |
| <i>N</i> -Acetyl-L-arginine               | 217.130    | 2.29     | POS  | 0.00040        | -4.1856 |
| Tetradecadiencarnitine                    | 368.282    | 13.48    | POS  | 0.00070        | 4.0968  |
| Tetradecenoylcarnitine                    | 370.297    | 13.89    | POS  | 0.0038         | 3.7897  |
| Hexadecadienoylcarnitine                  | 396.3113   | 14.11    | POS  | 0.0062         | 3.6111  |
| Hexadecenoylcarnitine                     | 398.3277   | 14.442   | POS  | 0.0029         | 3.8071  |
| Oxoarginine                               | 174.087    | 2.05     | POS  | 0.00629        | -3.6087 |
| Betaine                                   | 118.087    | 1.50     | POS  | 0.01298        | -3.3813 |
| $\alpha$ -GPC                             | 258.111    | 1.44     | POS  | 0.01866        | 3.2504  |
| Gluconic acid                             | 195.050    | 1.43     | NEG  | 0.02011        | -3.2218 |
| Serotonin                                 | 177.102    | 5.57     | POS  | 0.02313        | 3.1667  |
| Choline                                   | 104.107    | 1.43     | POS  | 0.03374        | 3.0072  |
| Glutamate                                 | 146.044    | 1.46     | NEG  | 0.03676        | 2.9686  |
| Aspartate                                 | 132.029    | 1.39     | NEG  | 0.05676        | 2.7572  |
| <i>N</i> -Acetyl-methionine               | 190.053    | 7.74     | NEG  | 0.09514        | -2.4667 |
| ADP                                       | 426.020    | 4.72     | NEG  | 0.11157        | 2.3670  |
| Hydroxyphenyllactic acid                  | 181.049    | 7.61     | NEG  | 0.14236        | -2.2035 |
| Glutamine                                 | 145.060    | 1.39     | NEG  | 0.17390        | 2.0582  |
| Adipoylcarnitine/ Methylglutarylcarnitine | 290.161    | 6.09     | POS  | 0.19781        | 1.9588  |
| Oxidized glutathione                      | 613.162    | 5.09     | POS  | 0.20650        | 1.9246  |
| <i>N</i> -acetyl-aspartate                | 174.039    | 2.91     | NEG  | 0.23188        | 1.8292  |
| Uric acid                                 | 167.020    | 3.58     | NEG  | 0.28937        | -1.6340 |
| Hydroxydodecanoyl carnitine               | 360.275    | 12.05    | POS  | 0.36004        | -1.4221 |
| Hydroxy-Octadecanoic acid                 | 299.258    | 16.20    | POS  | 0.41339        | -1.2765 |
| Xanthine                                  | 151.025    | 4.63     | NEG  | 0.44025        | -1.2067 |
| Pyroglutamate                             | 128.034    | 3.52     | NEG  | 0.47882        | 1.1101  |
| L-Tyrosine                                | 180.065    | 4.83     | NEG  | 0.48782        | -1.0880 |
| Glutathione                               | 308.092    | 2.61     | POS  | 0.53102        | 0.9848  |
| Succinylcarnitine                         | 262.129    | 4.23     | POS  | 0.61790        | -0.7871 |
| L-Phenylalanine                           | 164.070    | 6.37     | NEG  | 0.64400        | 0.7299  |
| Phenyllactic acid                         | 165.054    | 9.93     | NEG  | 0.67566        | -0.6615 |
| Pantothenic acid                          | 218.102    | 6.87     | NEG  | 0.68064        | -0.6508 |
| AMP                                       | 346.055    | 3.36     | NEG  | 0.69202        | -0.6266 |
| Uridine                                   | 243.061    | 4.96     | NEG  | 0.72765        | -0.5514 |
| <i>N</i> -acetyltryptophan                | 245.092    | 9.94     | NEG  | 0.72943        | -0.5476 |
| Citicoline                                | 489.114    | 1.69     | POS  | 0.73858        | -0.5285 |
| Hydroxyhexanoylcarnitine                  | 276.181    | 6.12     | POS  | 0.76397        | -0.4758 |
| <i>S</i> -Lactoylglutathione              | 380.110    | 5.44     | POS  | 0.80811        | -0.3852 |
| Cyclic AMP                                | 328.044    | 5.73     | NEG  | 0.82529        | -0.3502 |
| L-Carnitine                               | 162.113    | 1.48     | POS  | 0.84454        | 0.3111  |

|               |         |      |     |         |        |
|---------------|---------|------|-----|---------|--------|
| L-Tryptophan  | 203.081 | 7.39 | NEG | 0.85752 | 0.2849 |
| Ascorbic acid | 175.023 | 2.21 | NEG | 0.98073 | 0.0384 |

### SI References

1. Yu D, Zhou L, Xuan Q, Wang L, Zhao X, Lu X, et al. Strategy for Comprehensive Identification of Acylcarnitines Based on Liquid Chromatography-High-Resolution Mass Spectrometry. *Anal Chem.* 2018;90(9):5712-8.
2. Yan X, Markey SP, Marupaka R, Dong Q, Cooper BT, Mirokhin YA, et al. Mass Spectral Library of Acylcarnitines Derived from Human Urine. *Anal Chem.* 2020;92(9):6521-8.
3. Schymanski EL, Jeon J, Gulde R, Fenner K, Ruff M, Singer HP, et al. Identifying small molecules via high resolution mass spectrometry: communicating confidence. *Environ Sci Technol.* 2014;48(4):2097-8.
4. Correia MSP, Jain A, Alotaibi W, Young Tie Yang P, Rodriguez-Mateos A, Globisch D. Comparative dietary sulfated metabolome analysis reveals unknown metabolic interactions of the gut microbiome and the human host. *Free Radic Biol Med.* 2020;160:745-54.
